# Supplementary material for: Regioselective Mercury(I)/Palladium(II)-Catalyzed Single-Step Approach for the Synthesis of Imines and 2-Substituted Indoles
Source: MDPI journal article supplement (doi:10.3390/molecules26134092), 2021-07-05
Supplement: s1 [file s1]

# SUPPLEMENTARY INFORMATION

## Regioselective Mercury(I)/Palladium(II)-catalyzed Single-Step Approach for the Synthesis of Imines and 2-Substituted Indoles

Rsuini U. Gutiérrez<sup>1</sup>, Mayra Hernández-Montes<sup>1</sup>, Aarón Mendieta-Moctezuma<sup>2</sup>,  
Francisco Delgado<sup>1</sup> and Joaquín Tamariz<sup>1,\*</sup>

<sup>1</sup> Departamento de Química Orgánica, Escuela Nacional de Ciencias Biológicas,  
Instituto Politécnico Nacional, Prolongación de Carpio y Plan de Ayala S/N, 11340 Mexico City, Mexico

<sup>2</sup> Centro de Investigación en Biotecnología Aplicada, Instituto Politécnico Nacional, Carretera Estatal  
Santa Inés Tecuexcomac-Tepetitla, Km 1.5, 90700 Tlaxcala, Mexico

\* Author to whom correspondence should be addressed; E-Mail: [jtamarizm@gmail.com](mailto:jtamarizm@gmail.com);  
[jtamarizm@ipn.mx](mailto:jtamarizm@ipn.mx)

|                                                                                                |         |
|------------------------------------------------------------------------------------------------|---------|
| <b>1. Appendix 1.</b> <sup>1</sup> H and <sup>13</sup> C NMR spectra of all compounds.         | S2-S30  |
| <b>2. Appendix 2.</b> X-Ray crystallographic structures of <b>5i</b> , <b>6e</b> and <b>6l</b> | S31-S36 |

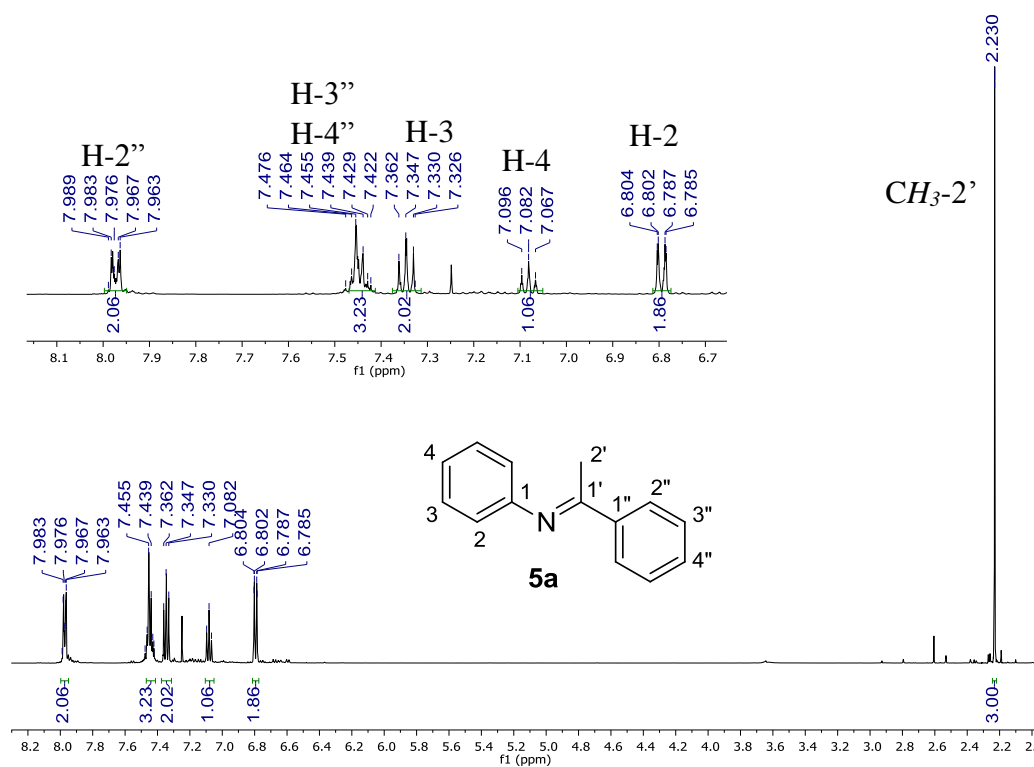

**Figure S1.** Spectrum of <sup>1</sup>H NMR (500 MHz, CDCl<sub>3</sub>) of **5a**.

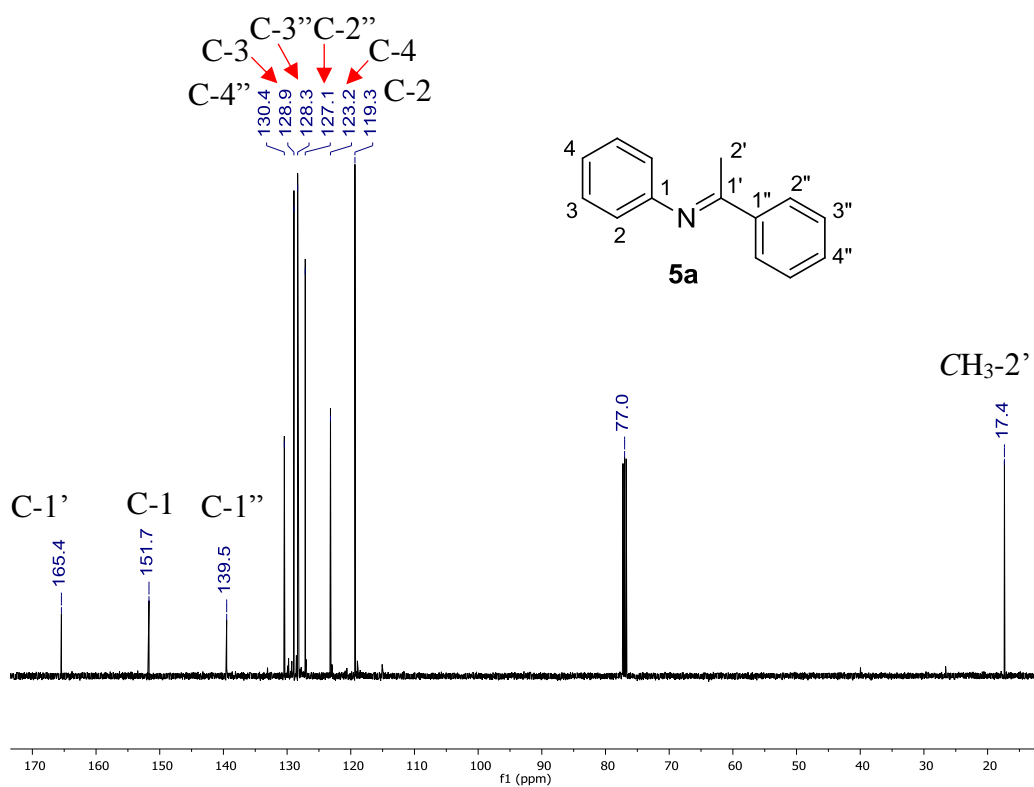

**Figure S2.** Spectrum of <sup>13</sup>C NMR (125 MHz, CDCl<sub>3</sub>) of **5a**.

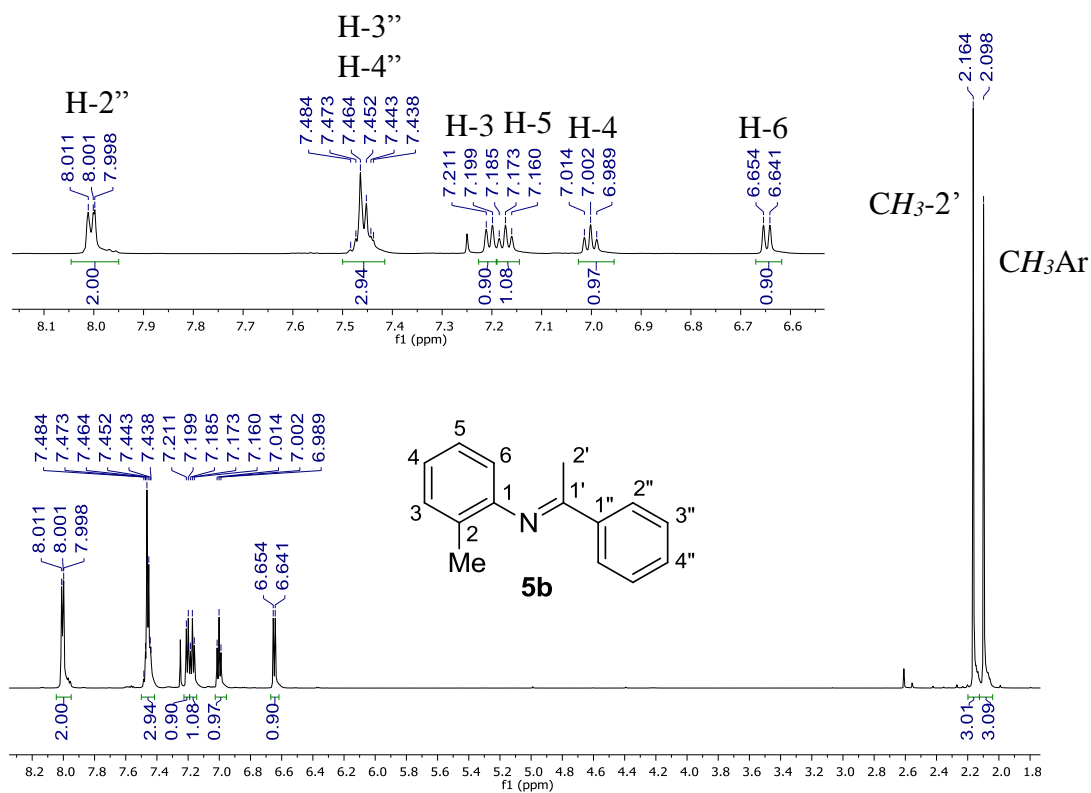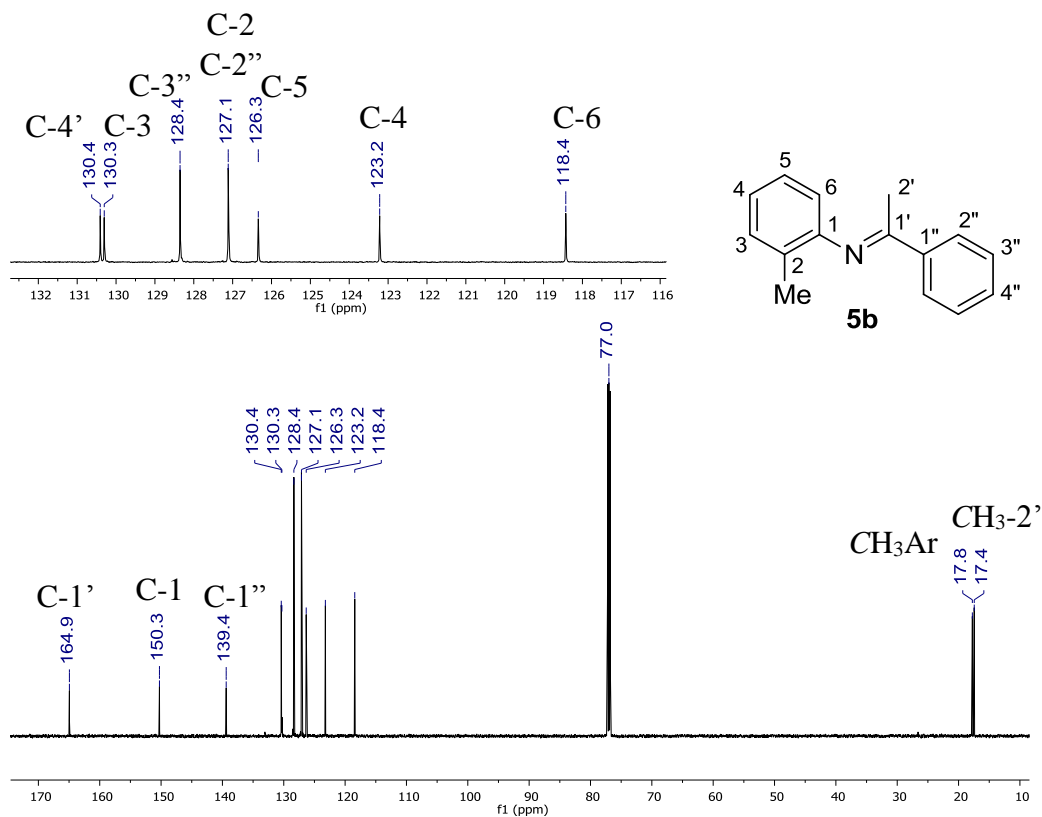

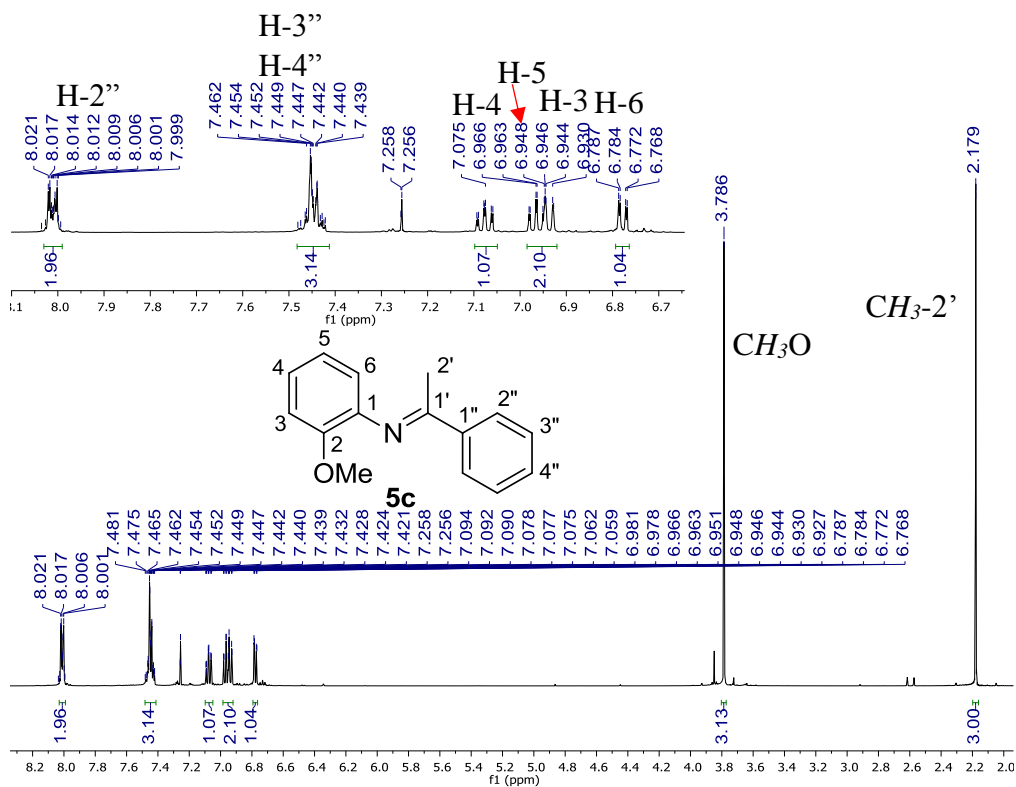

Figure S5. Spectrum of <sup>1</sup>H NMR (500 MHz, CDCl<sub>3</sub>) of 5c.

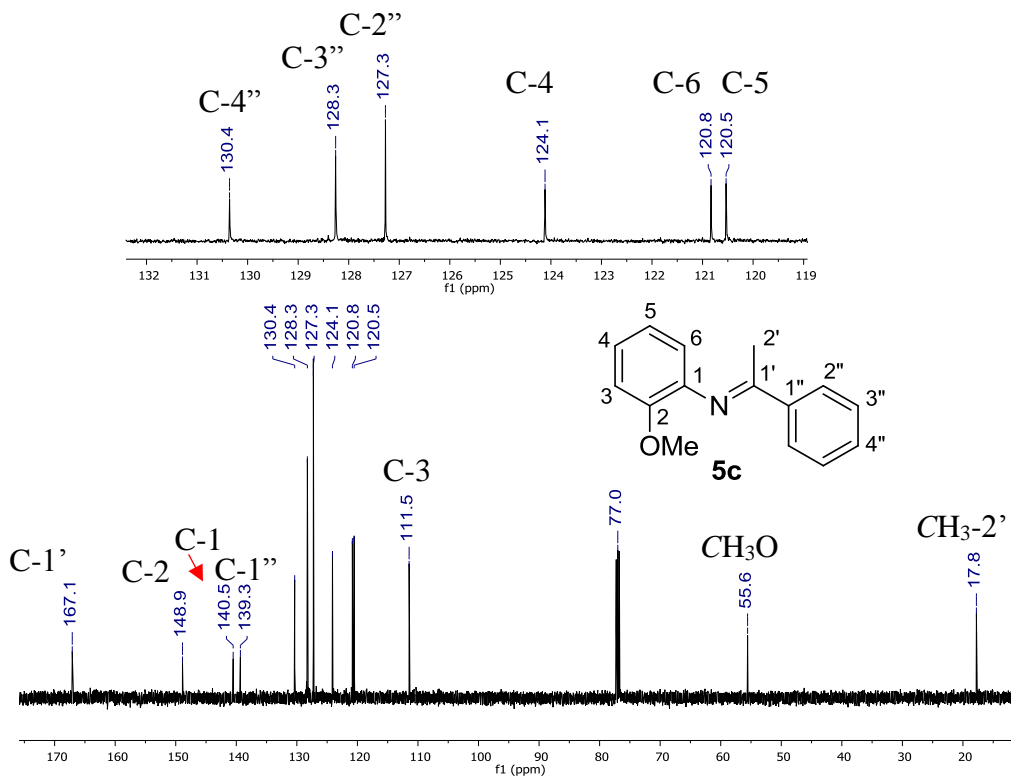

Figure S6. Spectrum of <sup>13</sup>C NMR (125 MHz, CDCl<sub>3</sub>) of 5c.

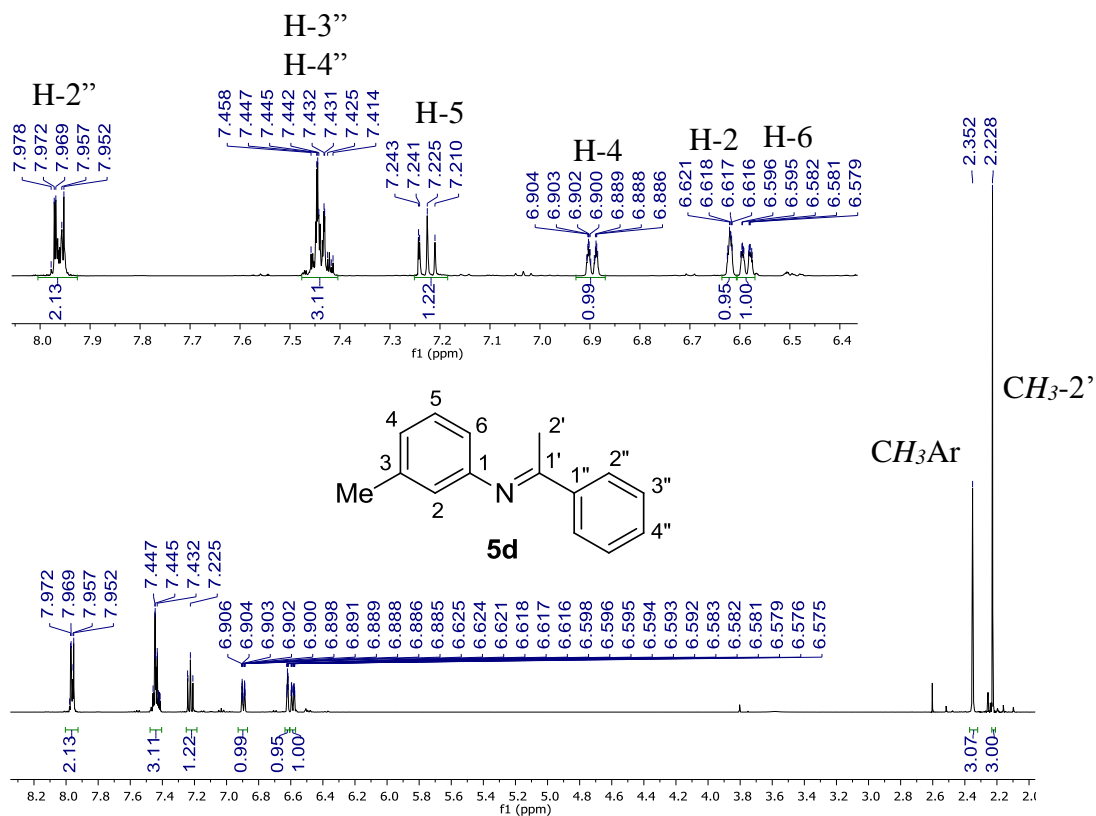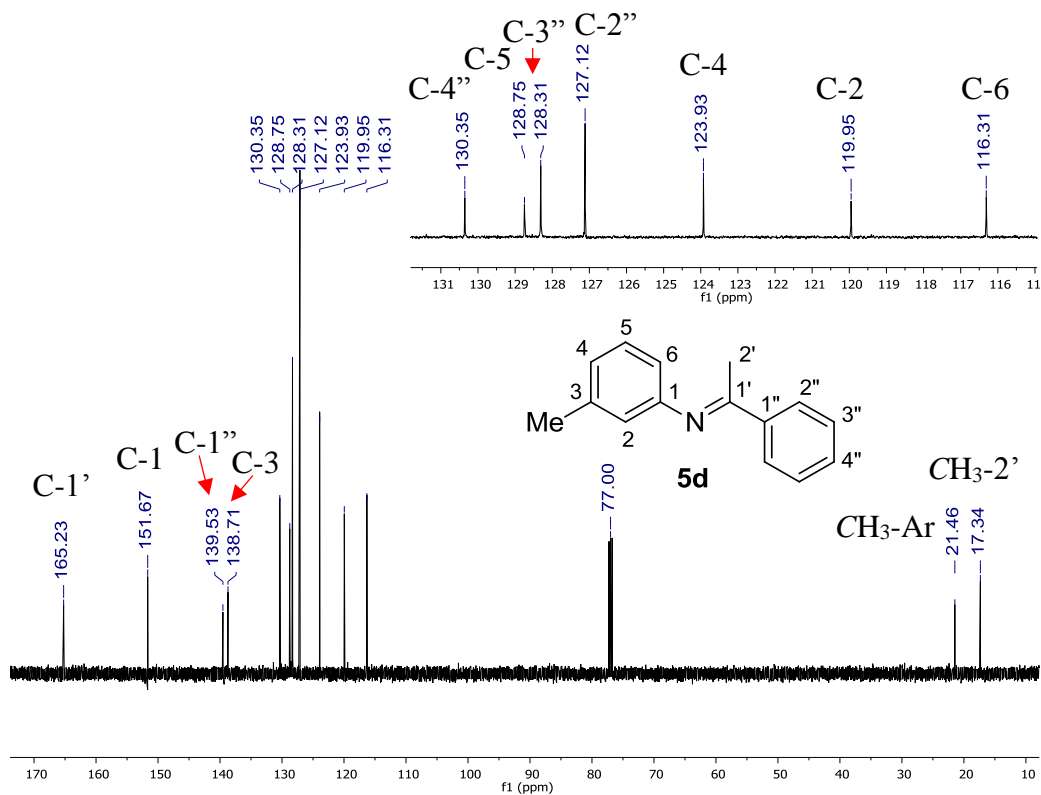

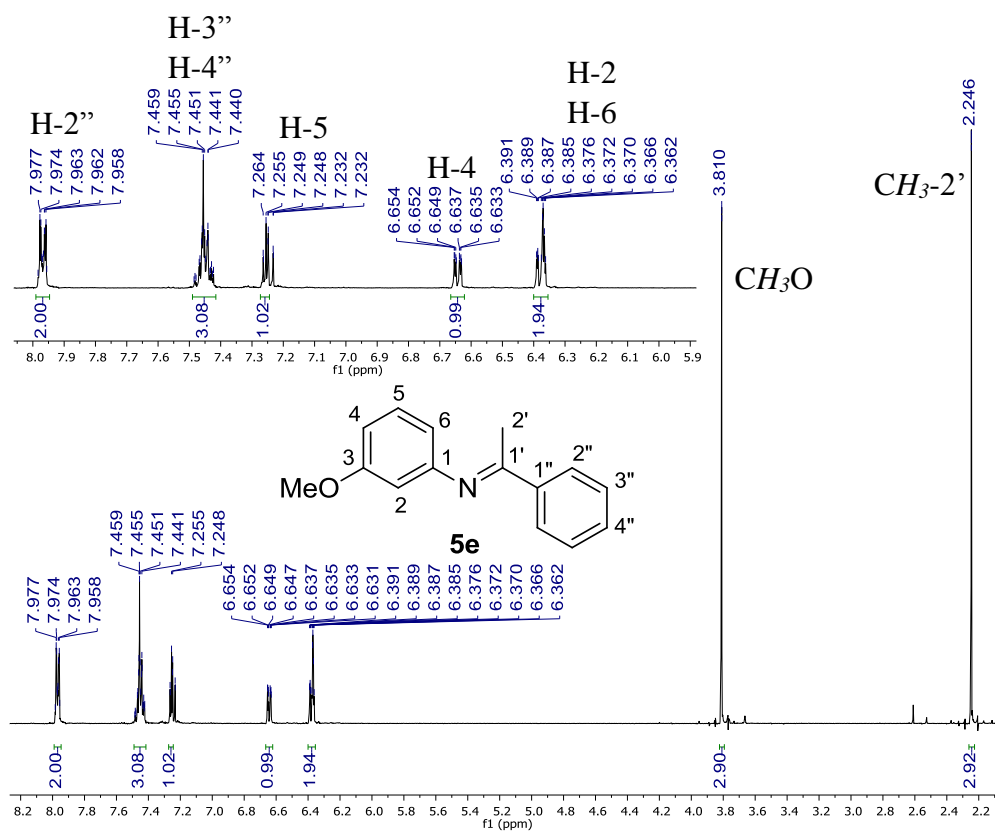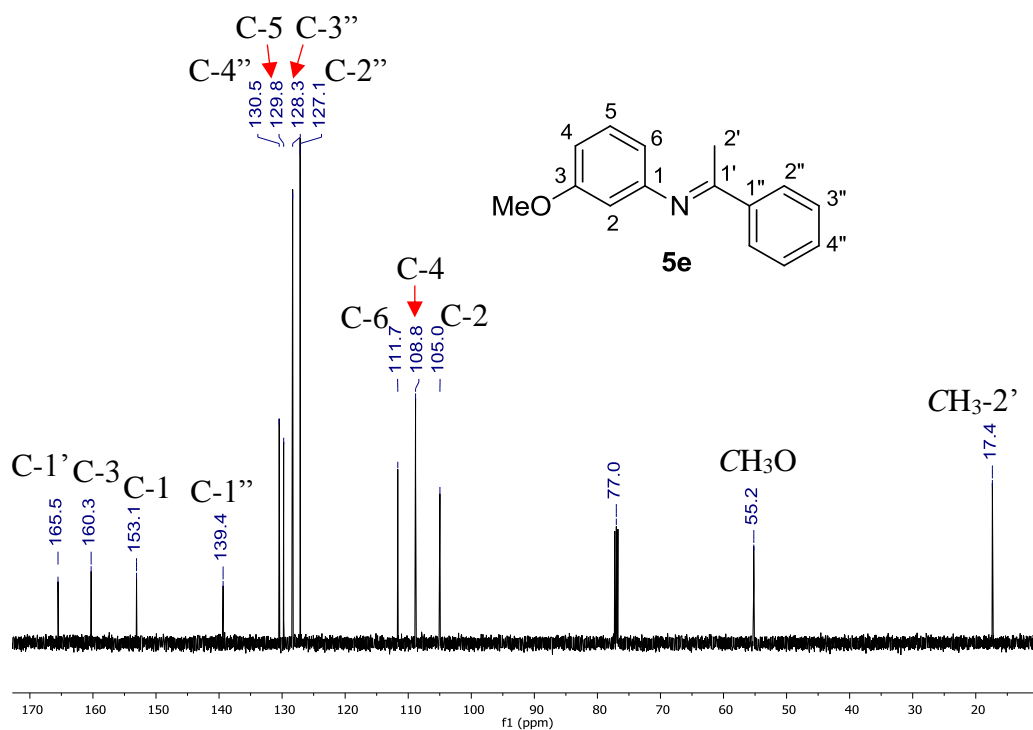

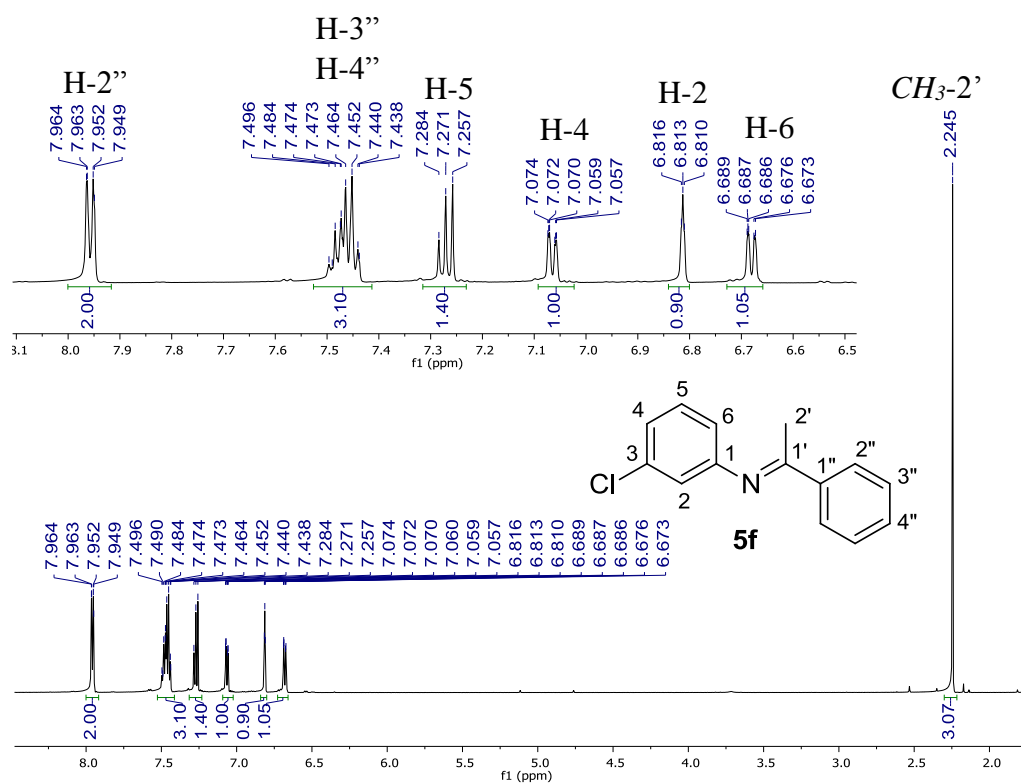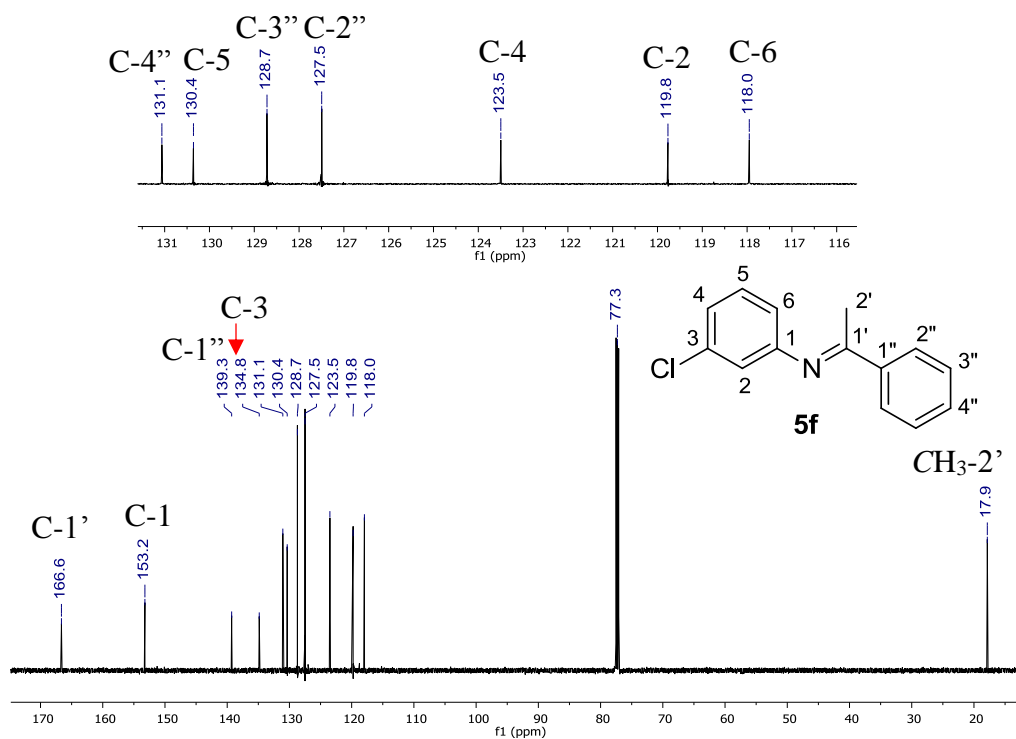

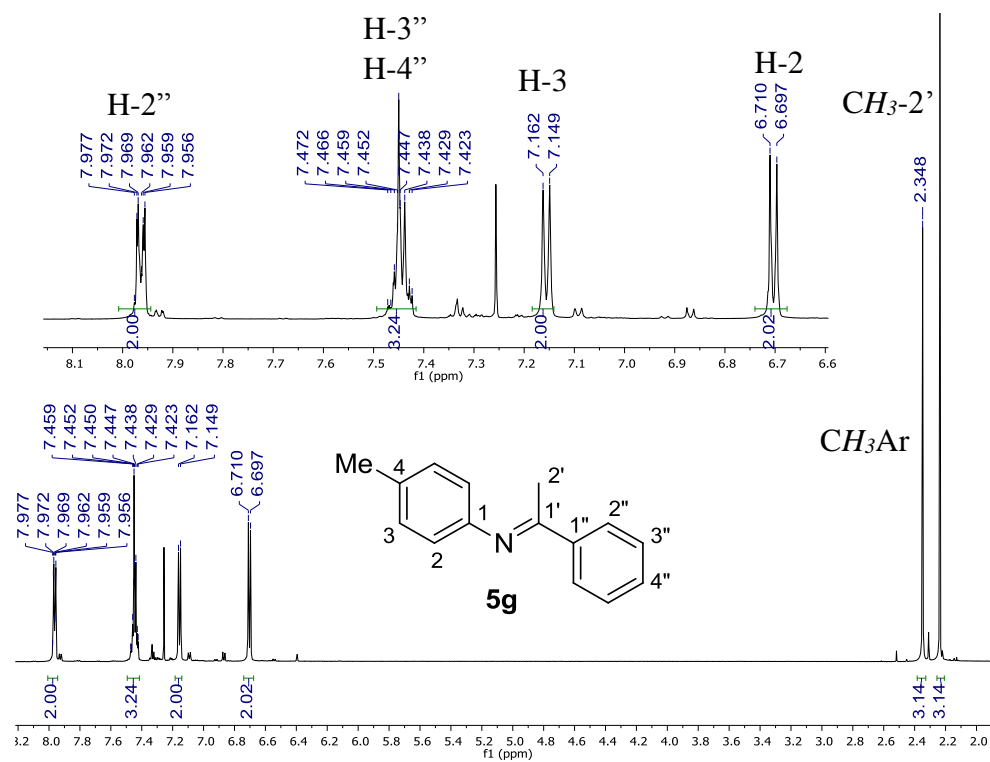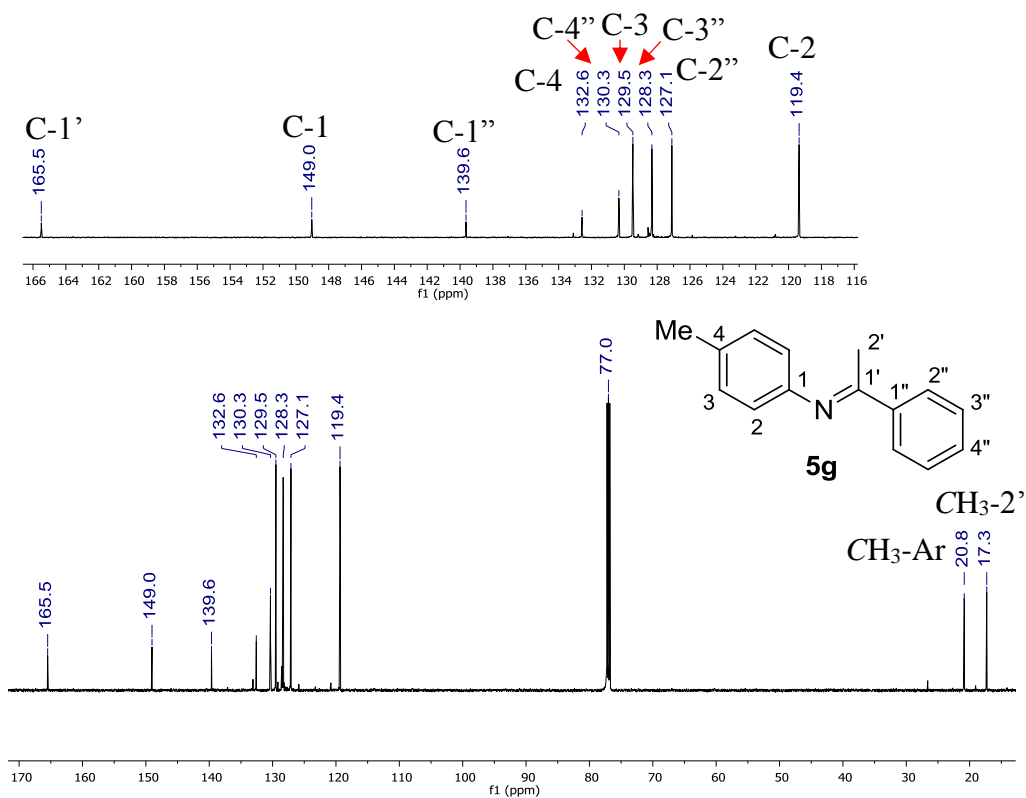

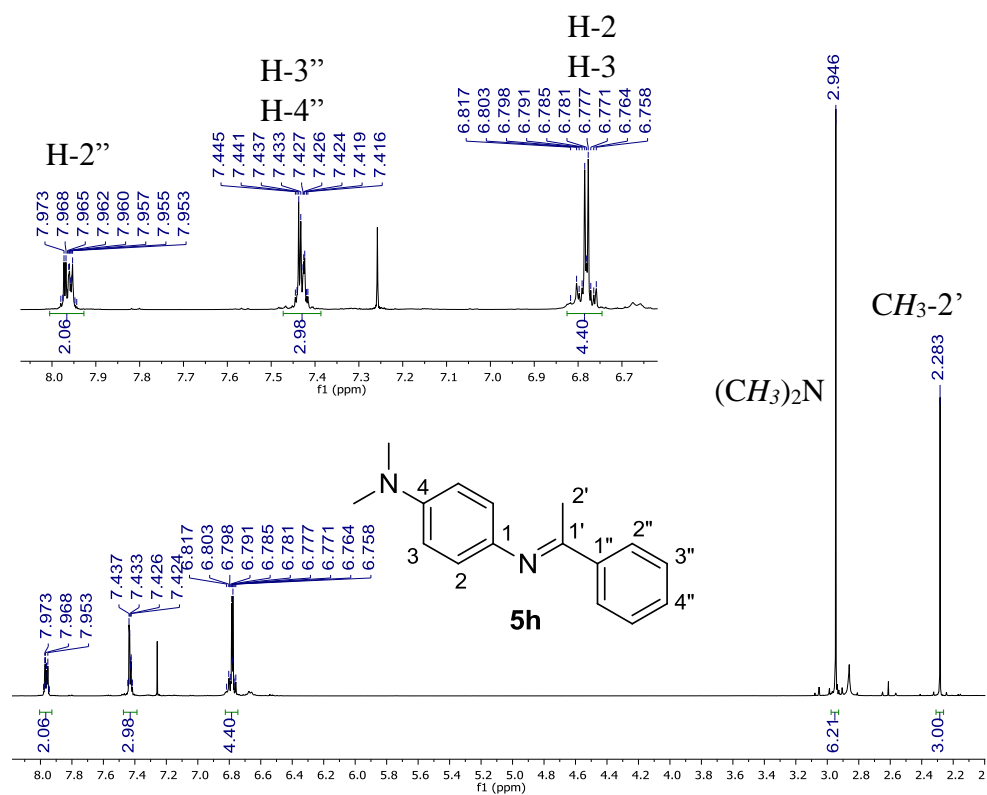

**Figure S15.** Spectrum of <sup>1</sup>H NMR (500 MHz, CDCl<sub>3</sub>) of **5h**.

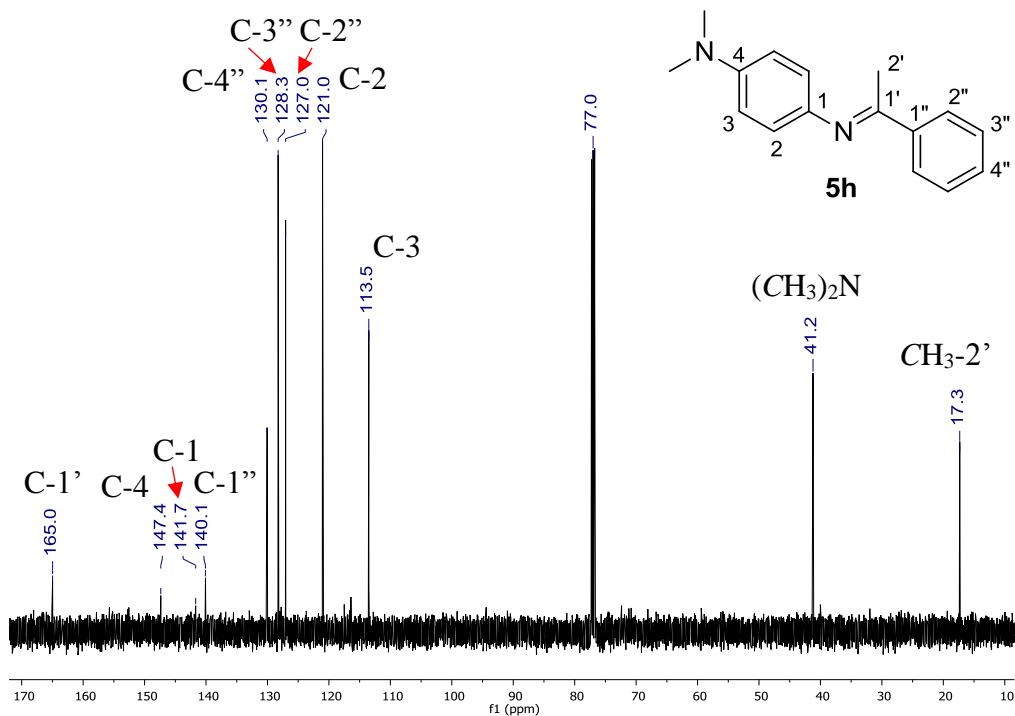

**Figure S16.** Spectrum of <sup>13</sup>C (125 MHz, CDCl<sub>3</sub>) of **5h**.

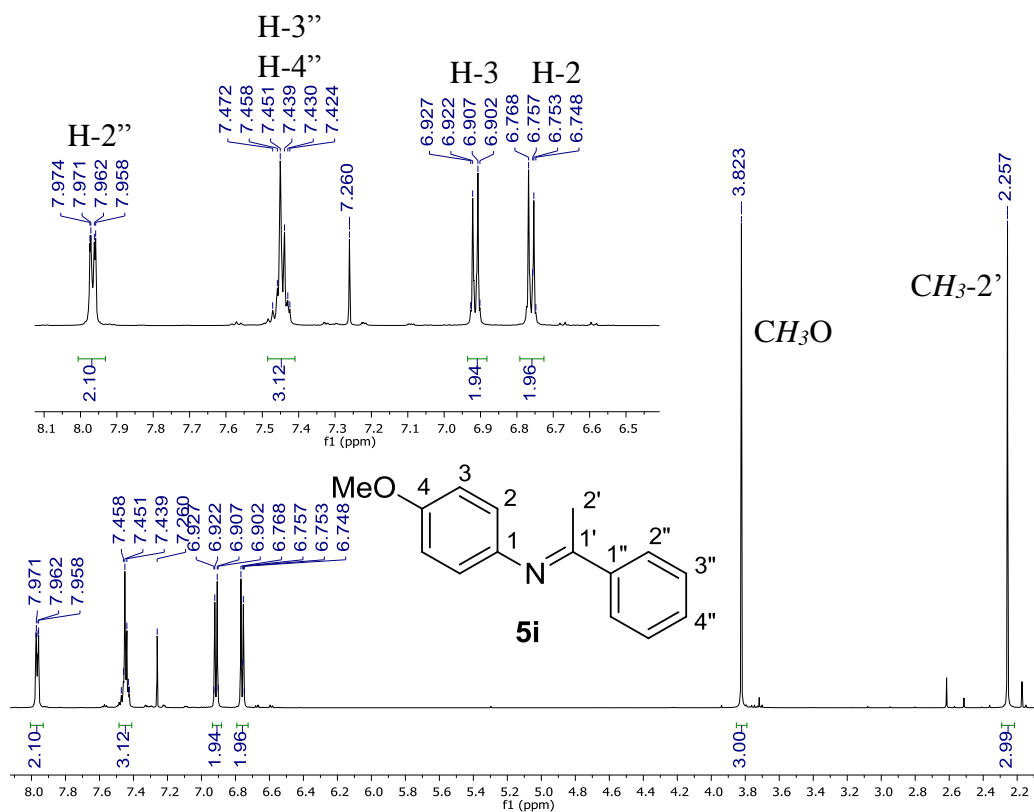

**Figure S17.** Spectrum of <sup>1</sup>H NMR (600 MHz, CDCl<sub>3</sub>) of **5i**.

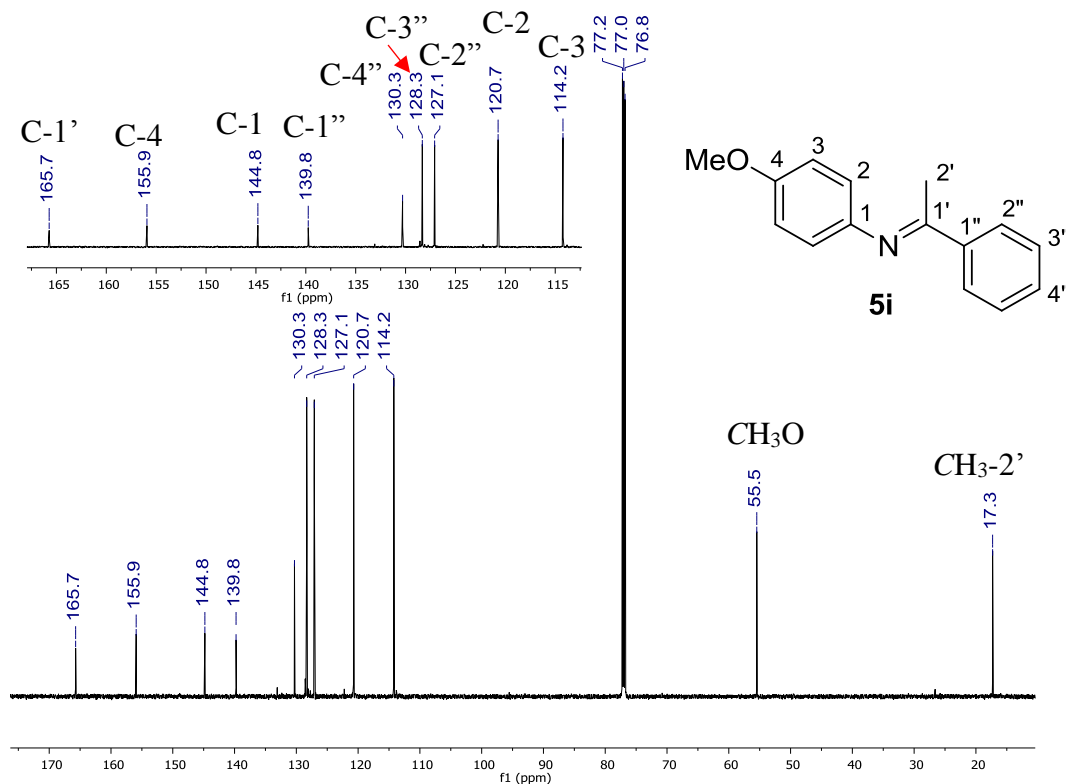

**Figure S18.** Spectrum of <sup>13</sup>C NMR (150 MHz, CDCl<sub>3</sub>) of **5i**.

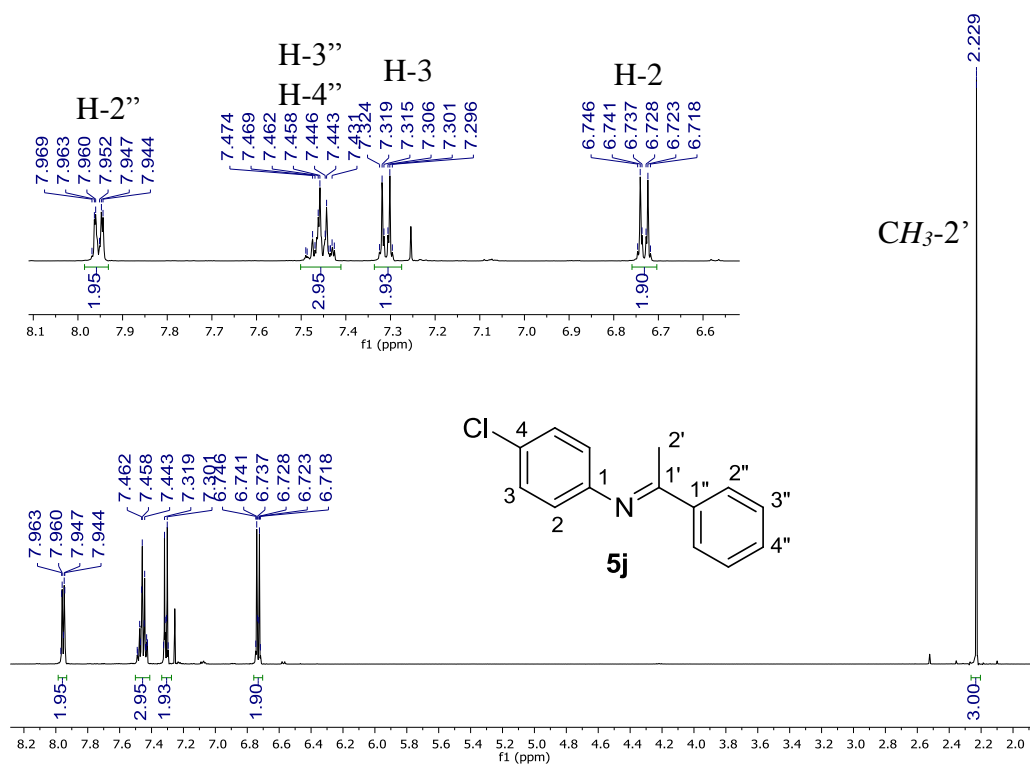

**Figure S19.** Spectrum of <sup>1</sup>H NMR (500 MHz, CDCl<sub>3</sub>) of **5j**.

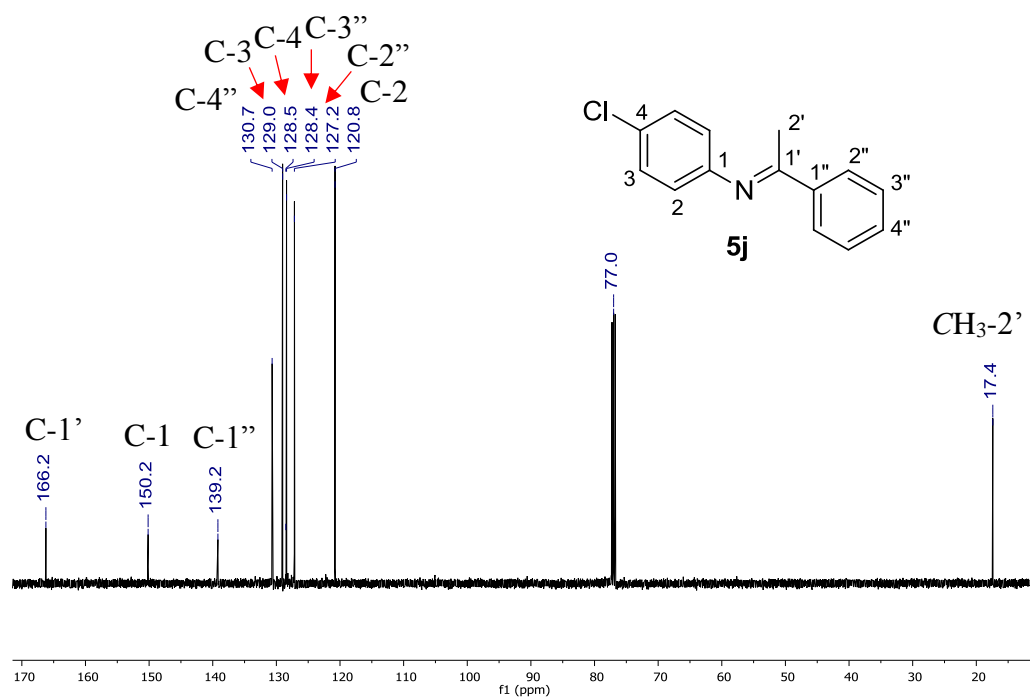

**Figure S20.** Spectrum of <sup>13</sup>C NMR (125 MHz, CDCl<sub>3</sub>) of **5j**.

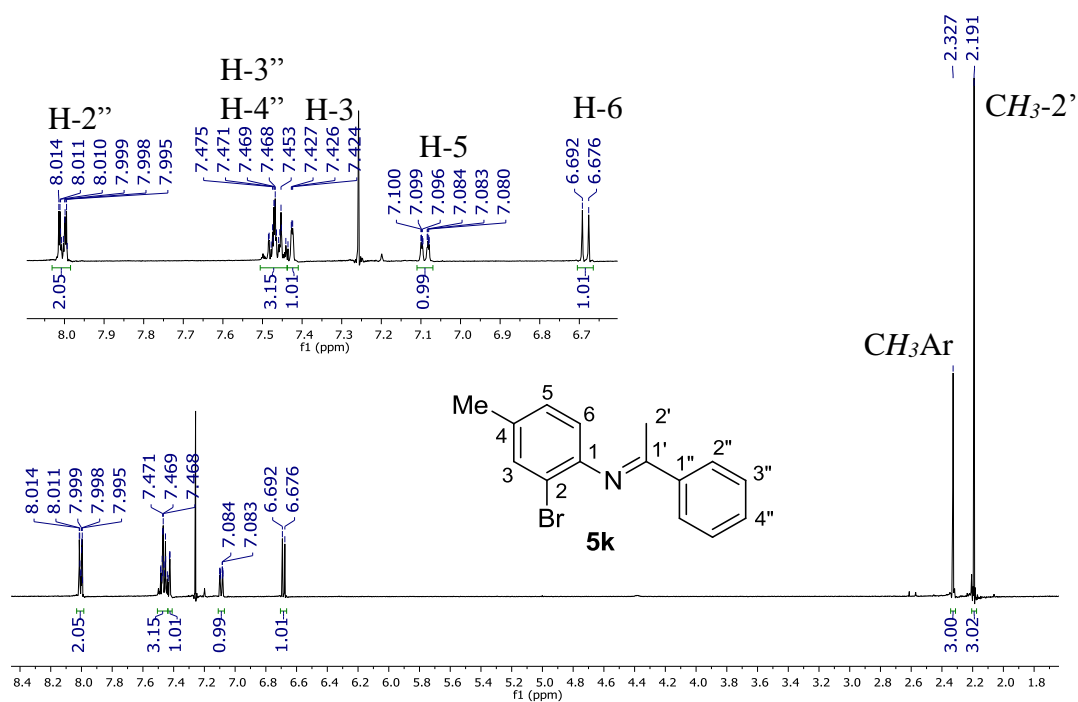

**Figure S21.** Spectrum of <sup>1</sup>H NMR (500 MHz, CDCl<sub>3</sub>) of **5k**.

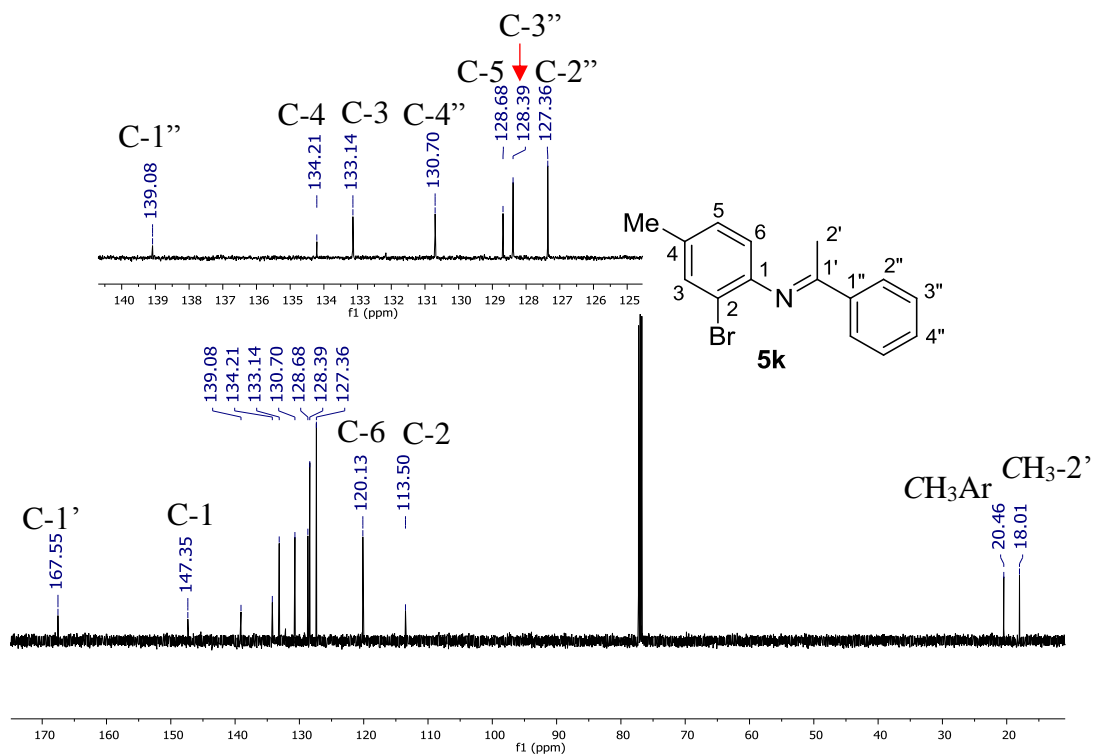

**Figure S22.** Spectrum of <sup>13</sup>C NMR (125 MHz, CDCl<sub>3</sub>) of **5k**.

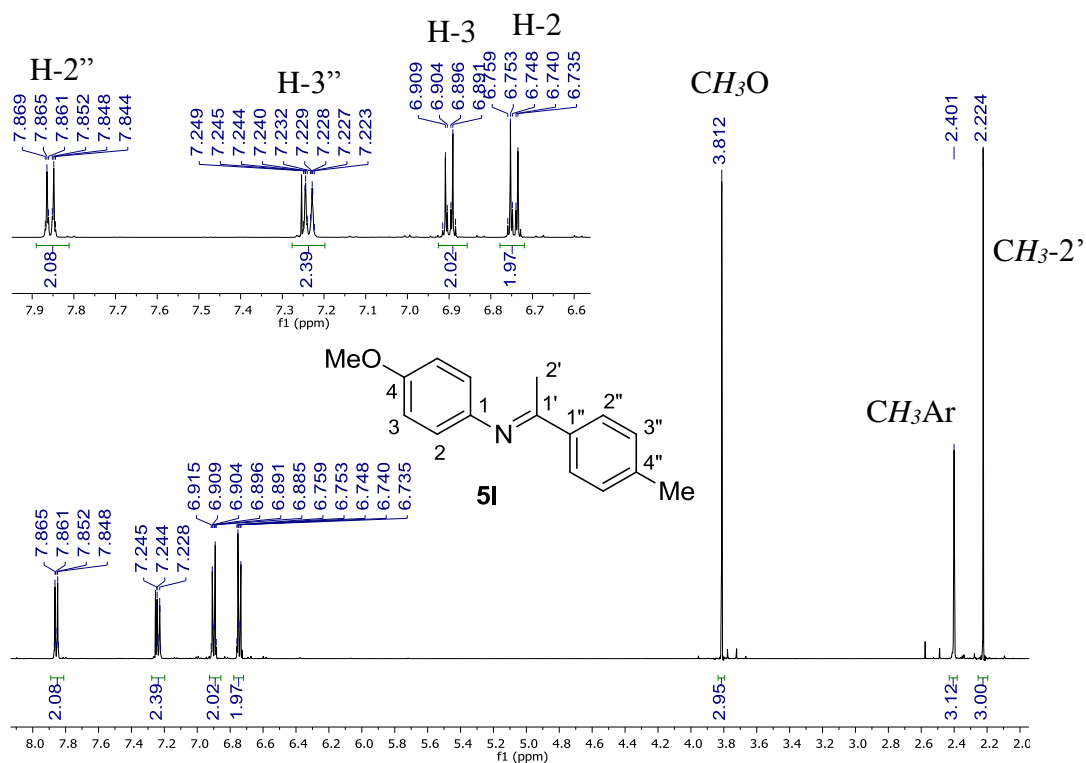

**Figure S23.** Spectrum of <sup>1</sup>H NMR (500 MHz, CDCl<sub>3</sub>) of **5I**.

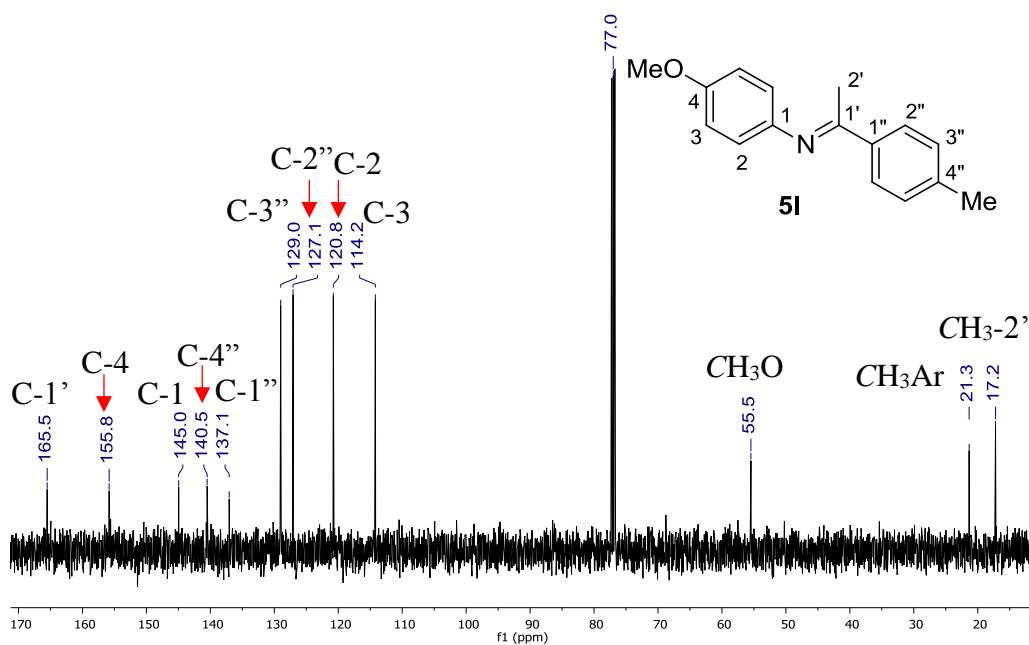

**Figure S24.** Spectrum of <sup>13</sup>C NMR (125 MHz, CDCl<sub>3</sub>) of **5I**.

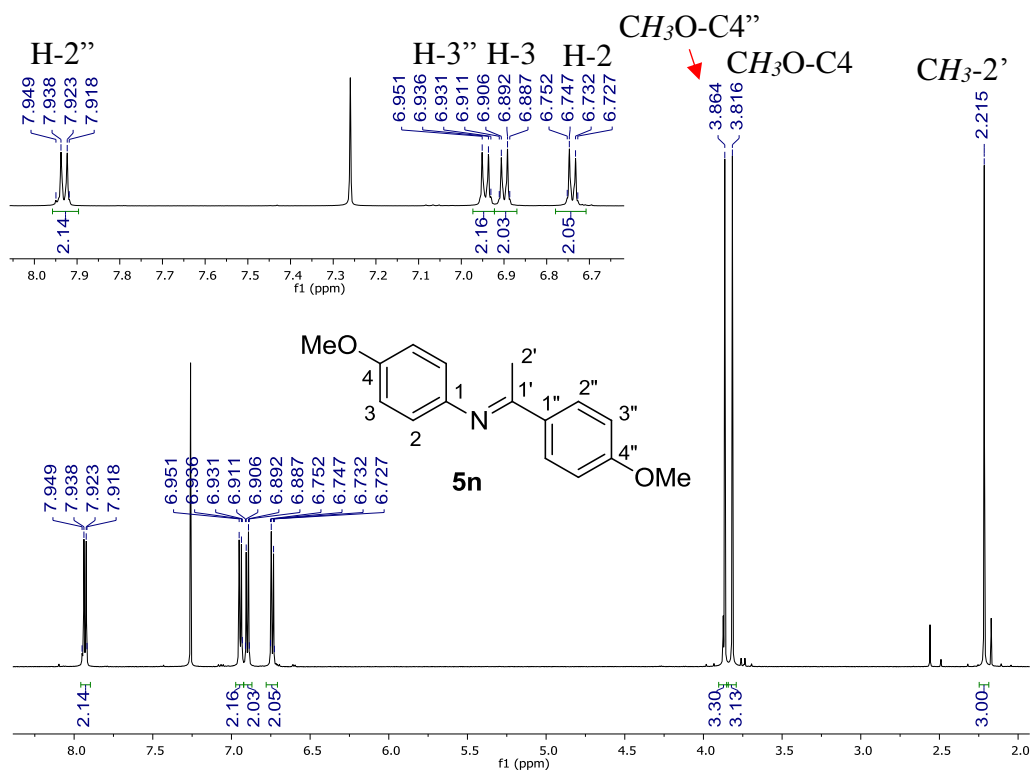

**Figure S25.** Spectrum of <sup>1</sup>H NMR (600 MHz, CDCl<sub>3</sub>) of 5n.

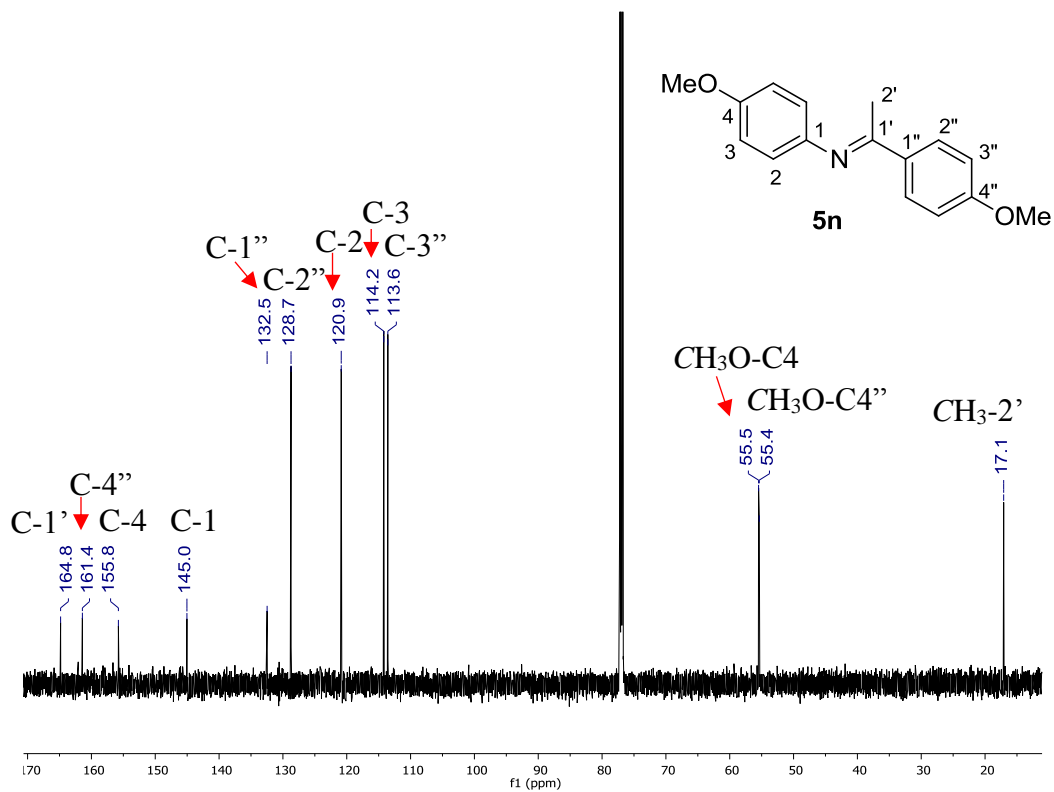

**Figure S26.** Spectrum of <sup>13</sup>C NMR (150 MHz, CDCl<sub>3</sub>) of 5n.

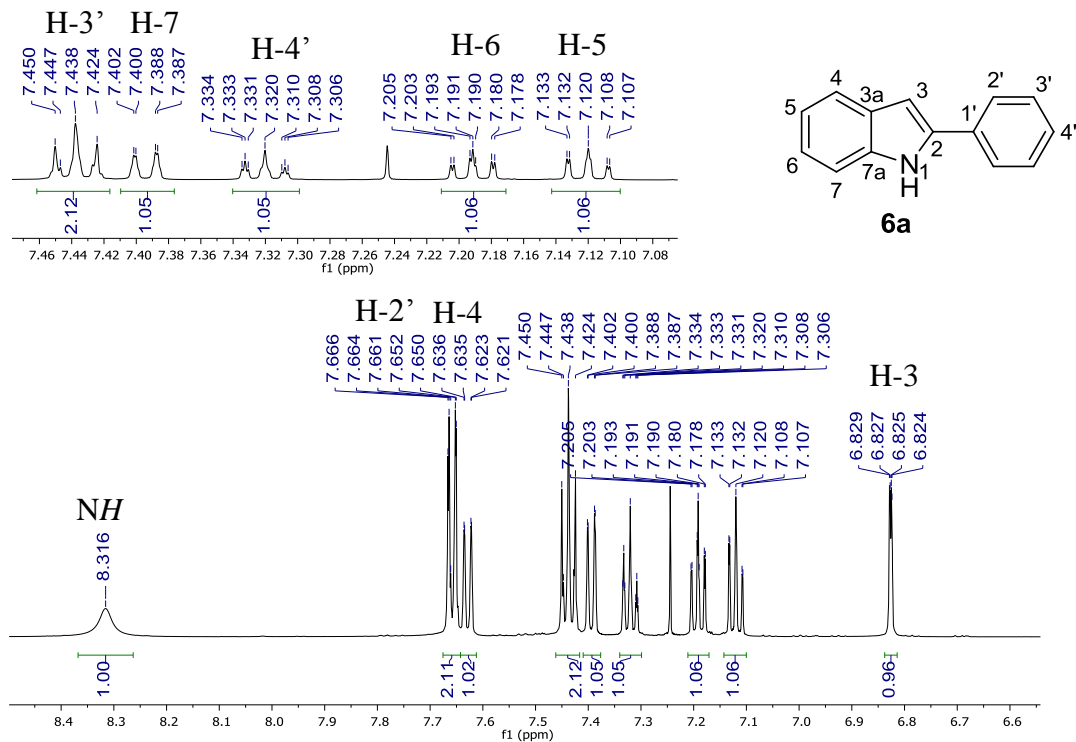

**Figure S27.** Spectrum of <sup>1</sup>H NMR (600 MHz, CDCl<sub>3</sub>) of 6a.

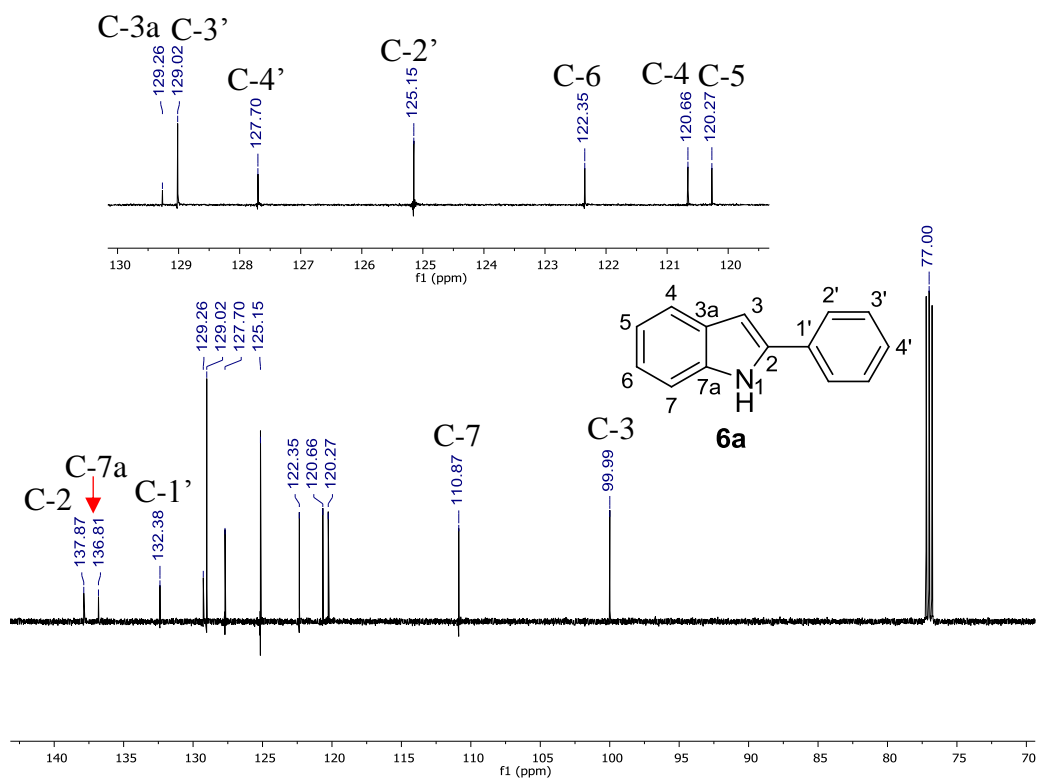

**Figure S28.** Spectrum of <sup>13</sup>C NMR (150 MHz, CDCl<sub>3</sub>) of 6a.

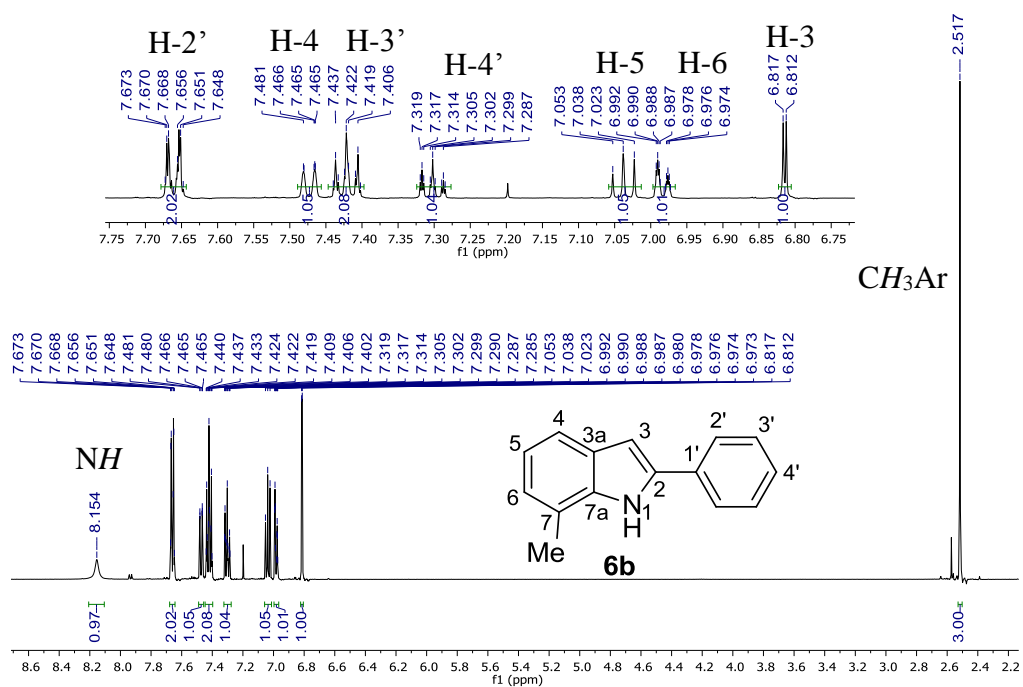

**Figure S29.** Spectrum of <sup>1</sup>H NMR (500 MHz, CDCl<sub>3</sub>) of **6b**.

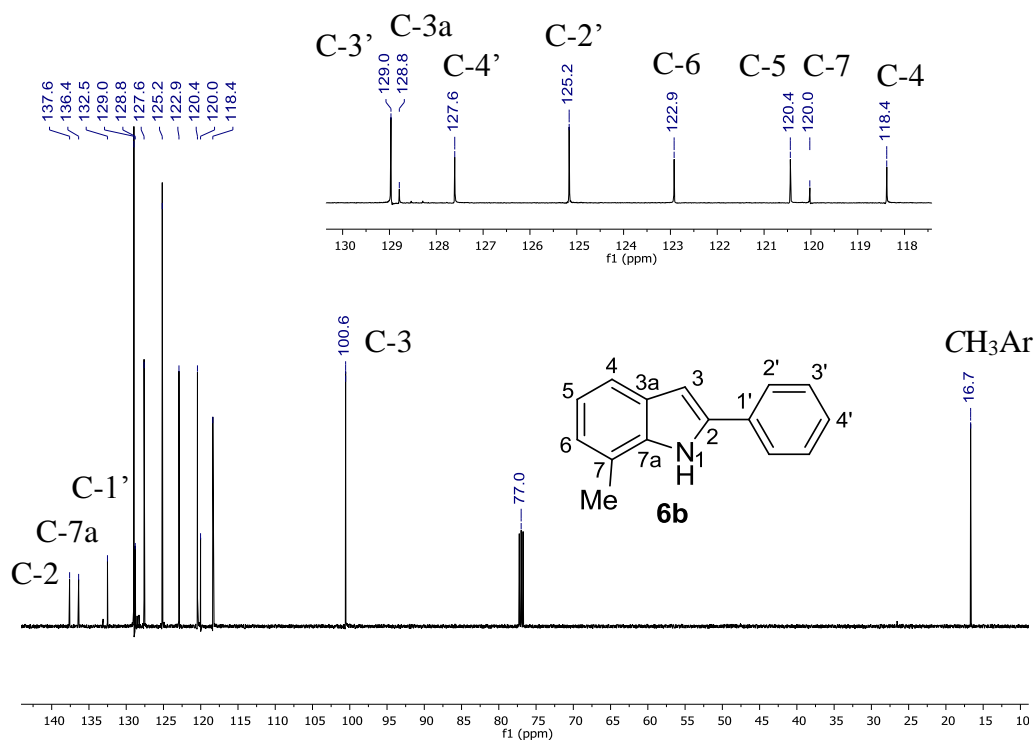

**Figure S30.** Spectrum of <sup>13</sup>C NMR (125 MHz, CDCl<sub>3</sub>) of **6b**.

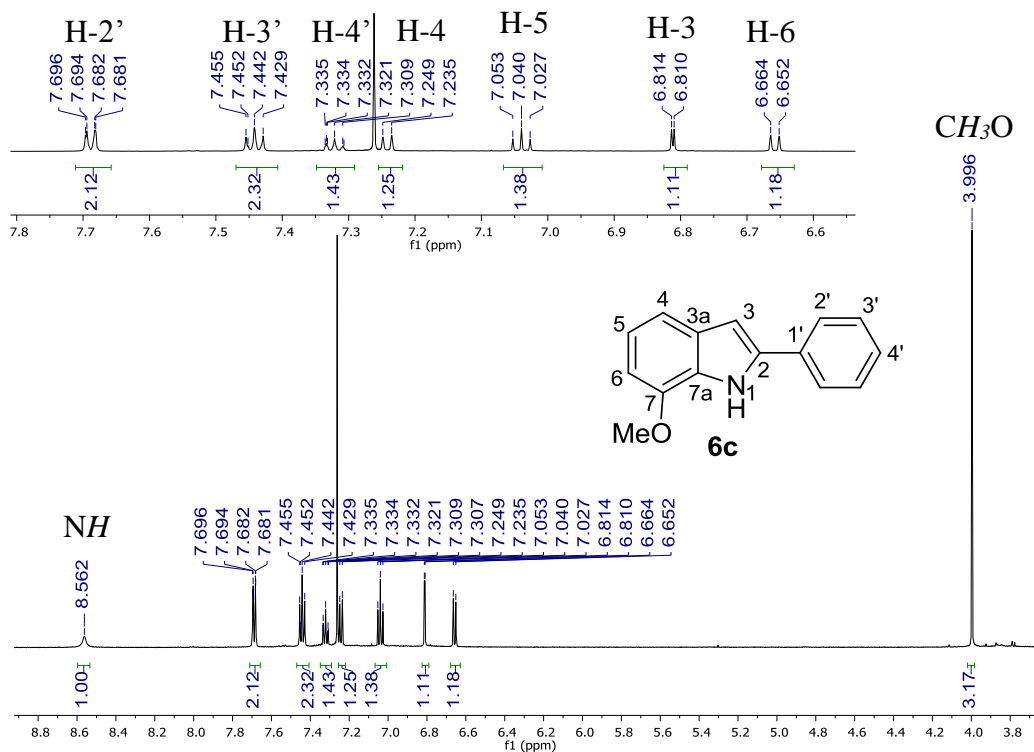

Figure S31. Spectrum of <sup>1</sup>H NMR (600 MHz, CDCl<sub>3</sub>) of 6c.

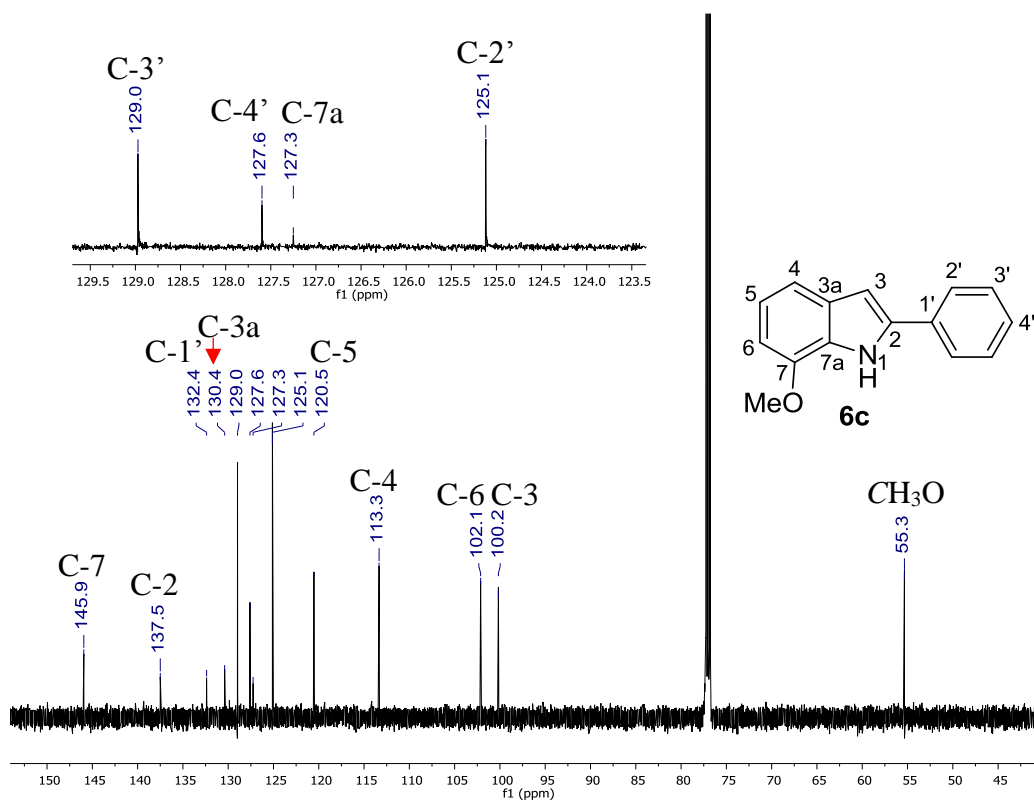

Figure S32. Spectrum of <sup>13</sup>C NMR (150 MHz, CDCl<sub>3</sub>) of 6c.

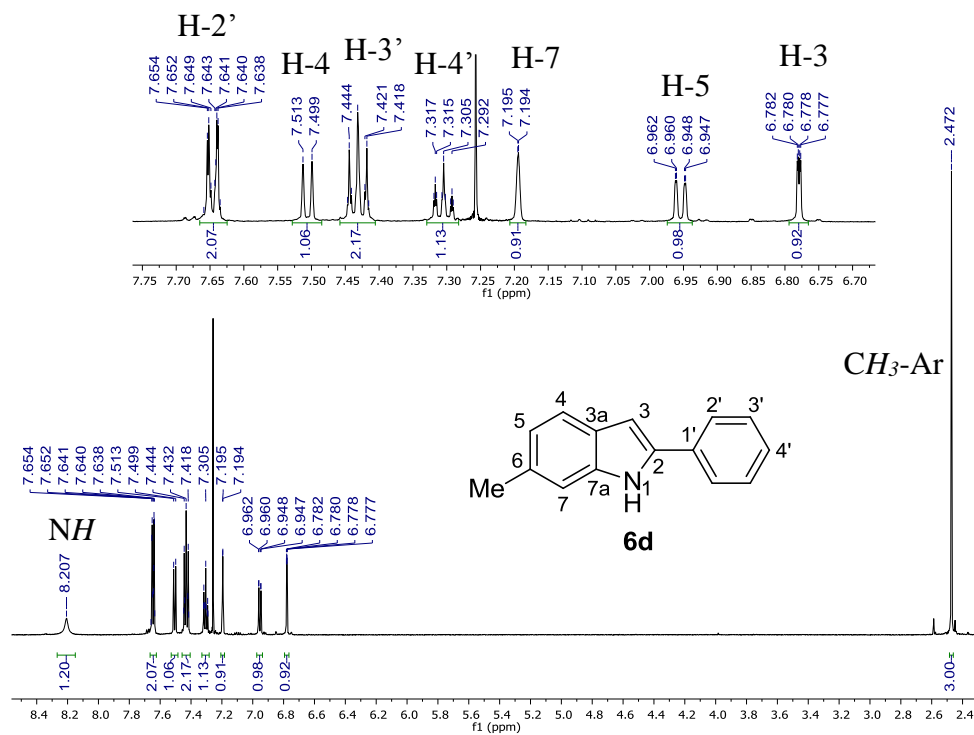

**Figure S33.** Spectrum of <sup>1</sup>H NMR (600 MHz, CDCl<sub>3</sub>) of 6d.

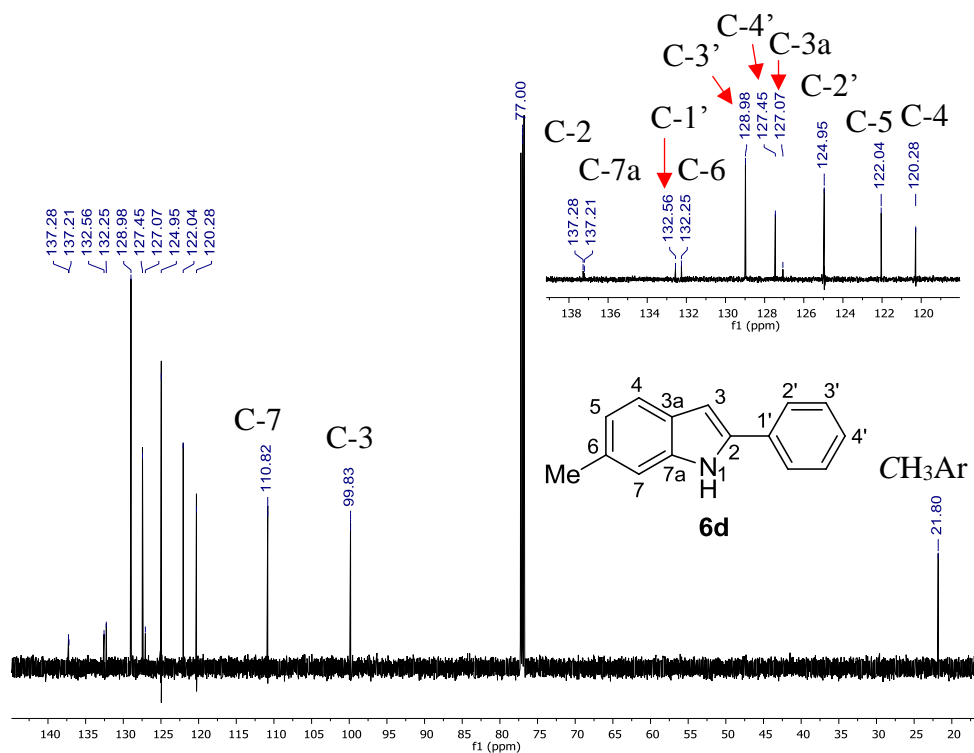

**Figure S34.** Spectrum of <sup>13</sup>C NMR (150 MHz, CDCl<sub>3</sub>) of 6d.

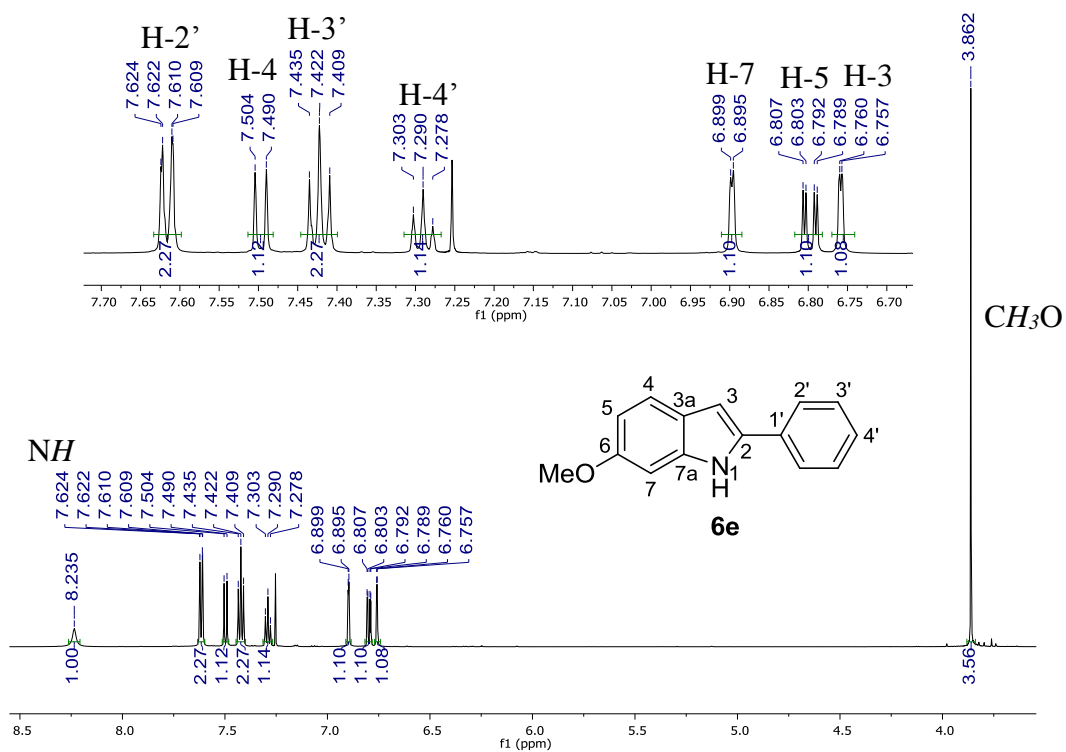

**Figure S35.** Spectrum of <sup>1</sup>H NMR (600 MHz, CDCl<sub>3</sub>) of 6e.

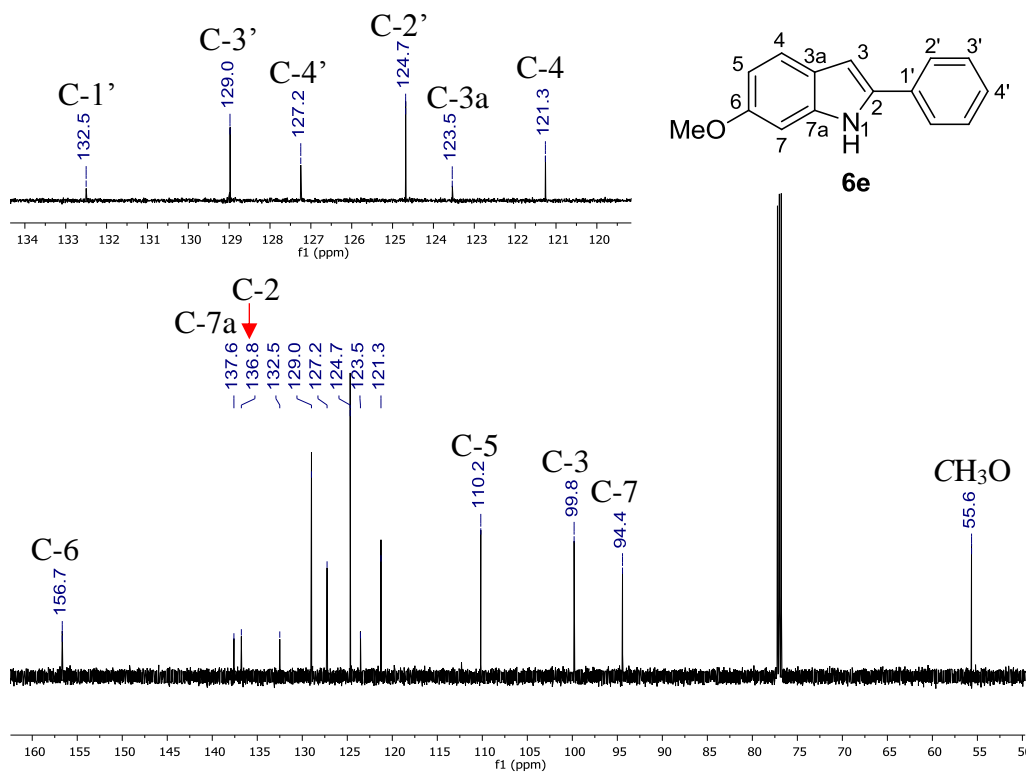

**Figure S36.** Spectrum of <sup>13</sup>C NMR (150 MHz, CDCl<sub>3</sub>) of 6e.

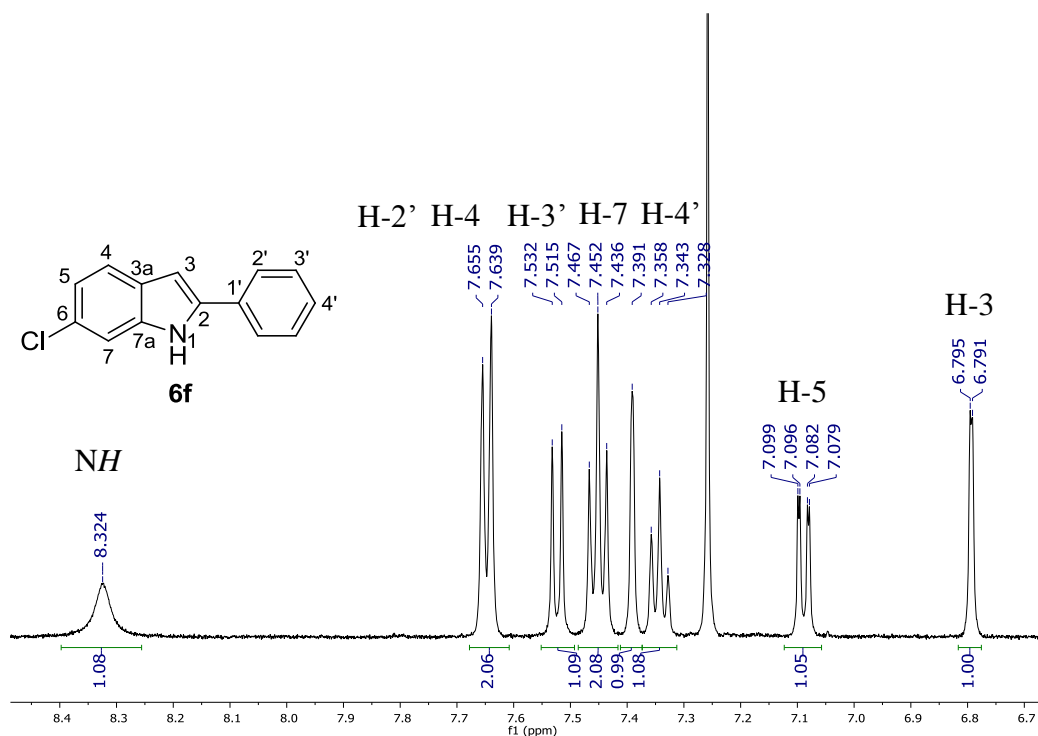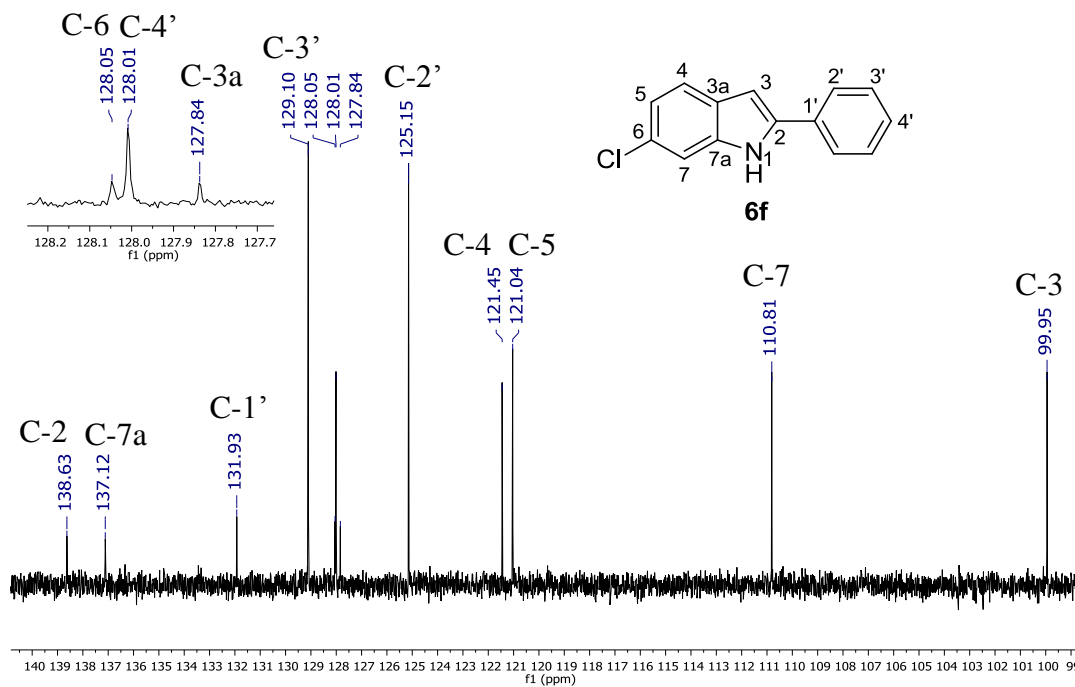

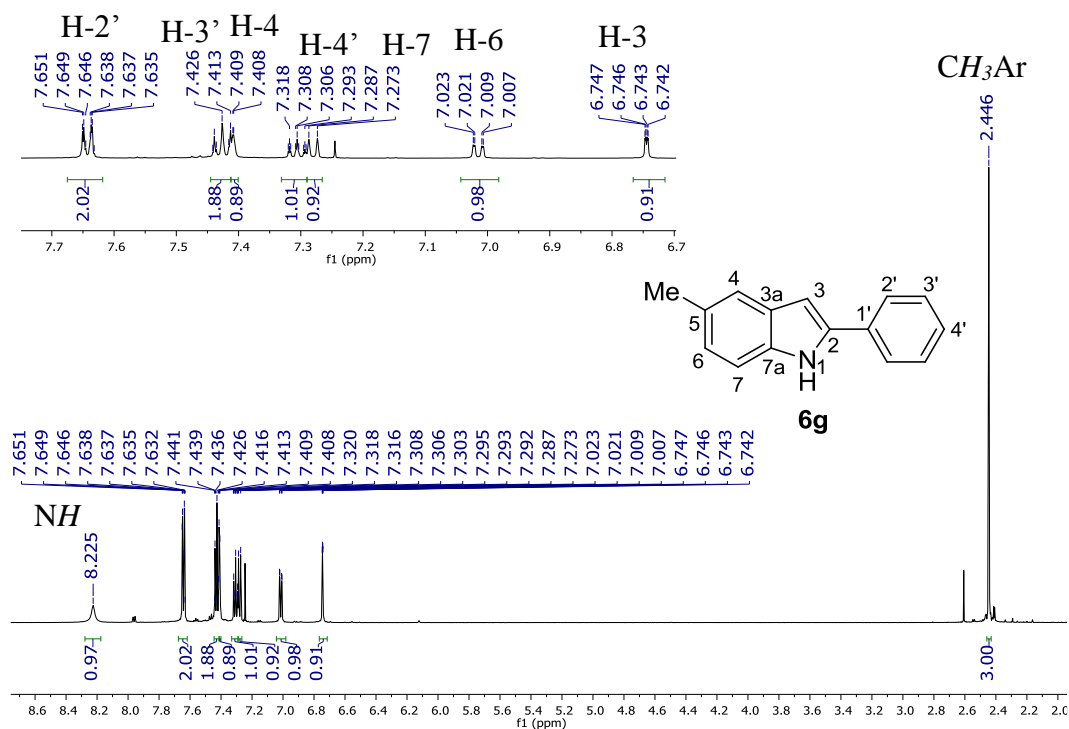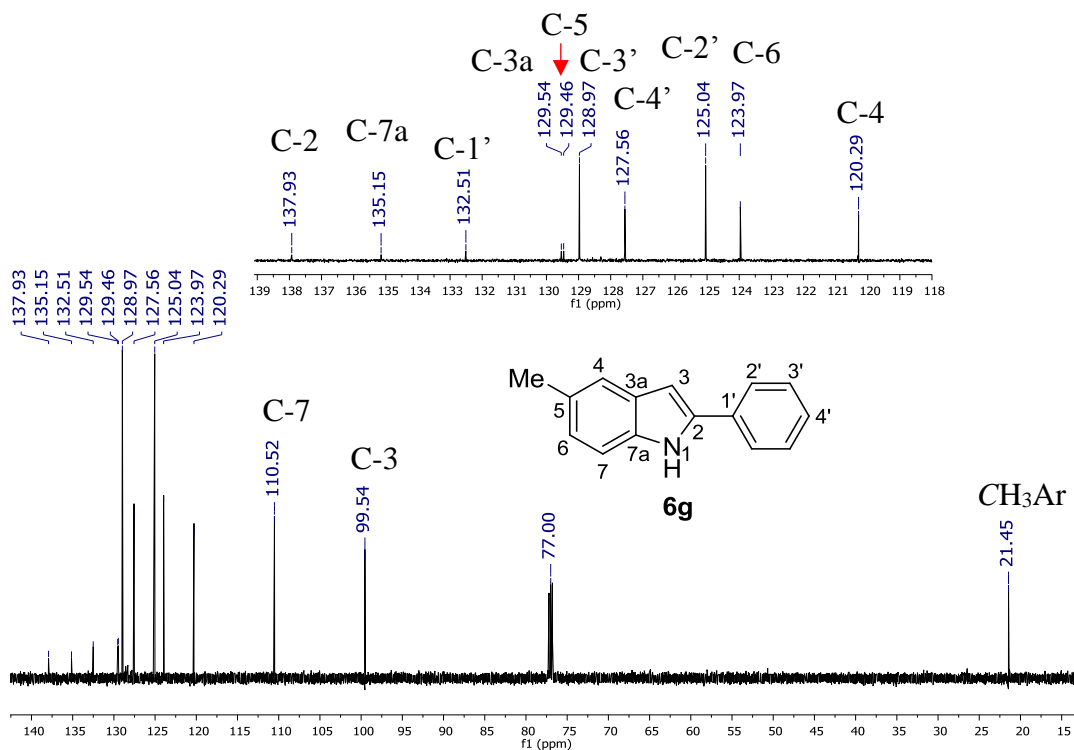

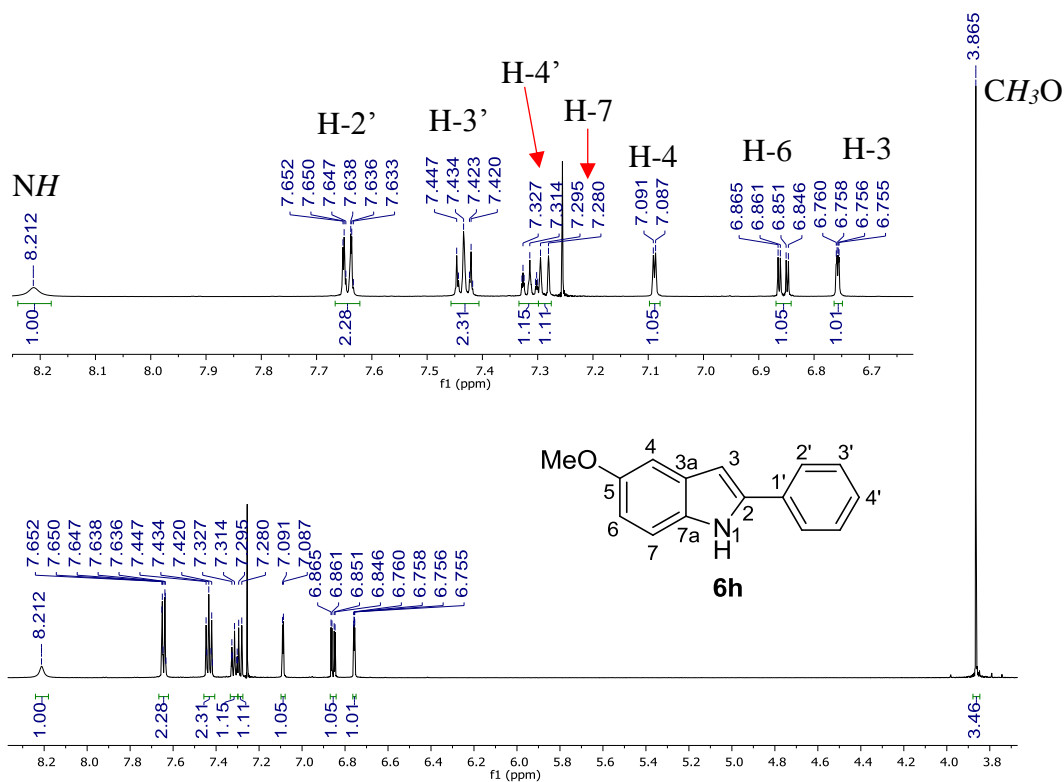

**Figure S41.** Spectrum of <sup>1</sup>H NMR (600 MHz, CDCl<sub>3</sub>) of 6h.

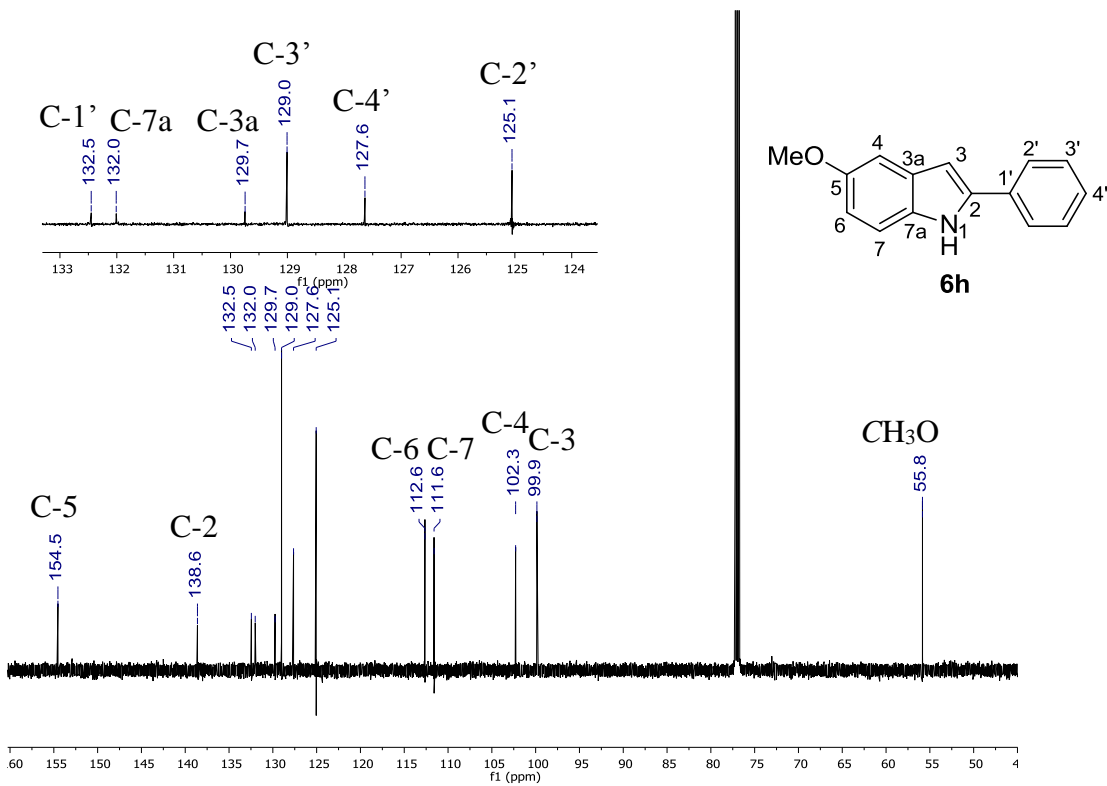

**Figure S42.** Spectrum of <sup>13</sup>C NMR (150 MHz, CDCl<sub>3</sub>) of 6h.

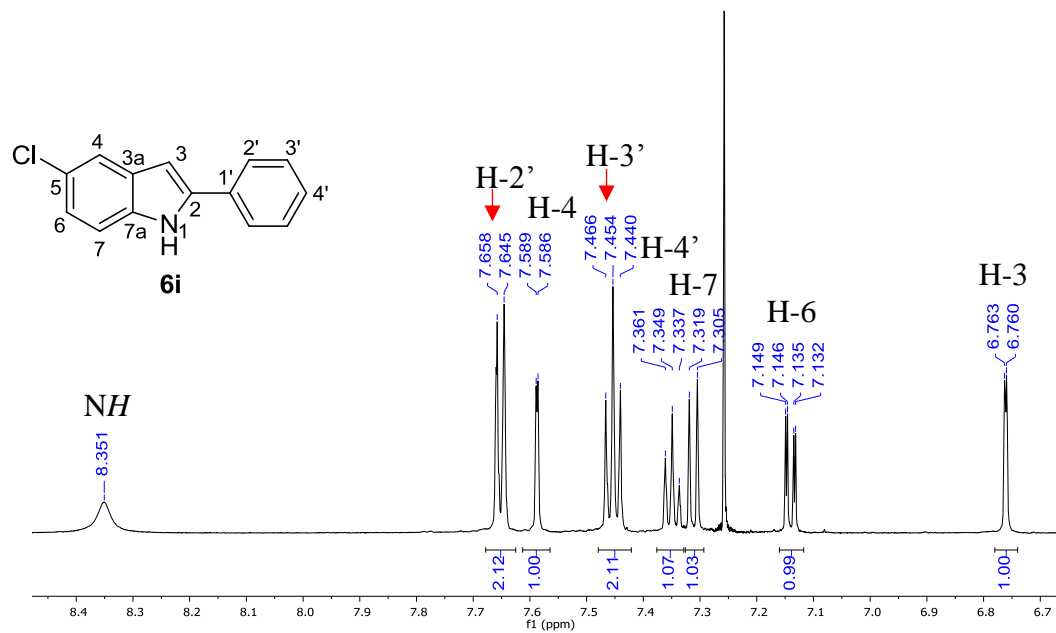

**Figure S43.** Spectrum of <sup>1</sup>H NMR (600 MHz, CDCl<sub>3</sub>) of **6i**.

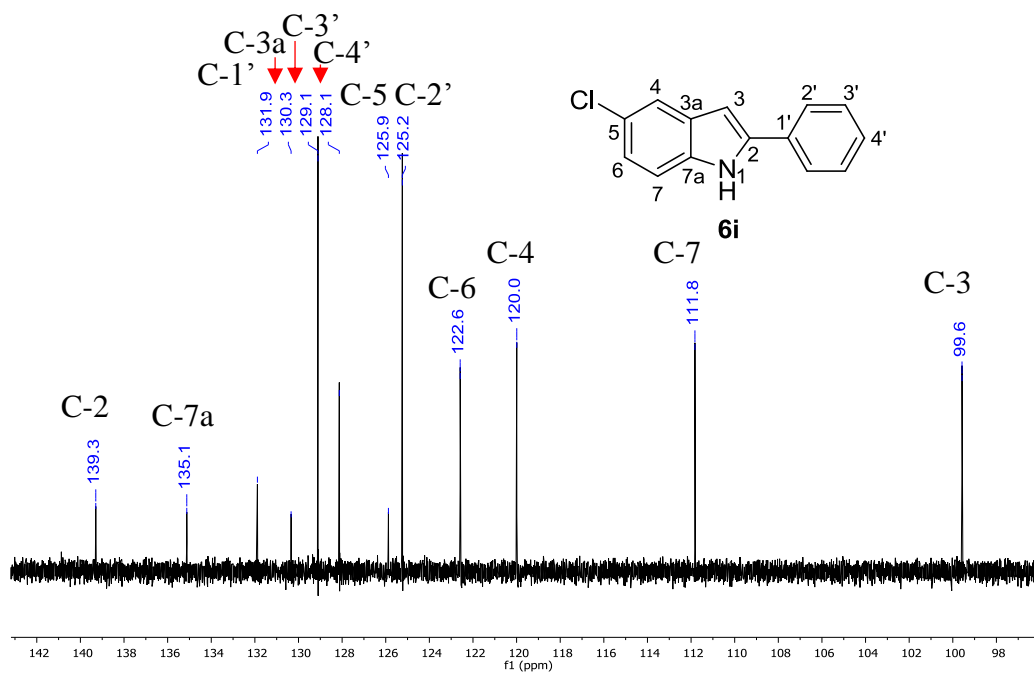

**Figure S44.** Spectrum of <sup>13</sup>C NMR (150 MHz, CDCl<sub>3</sub>) of **6i**.

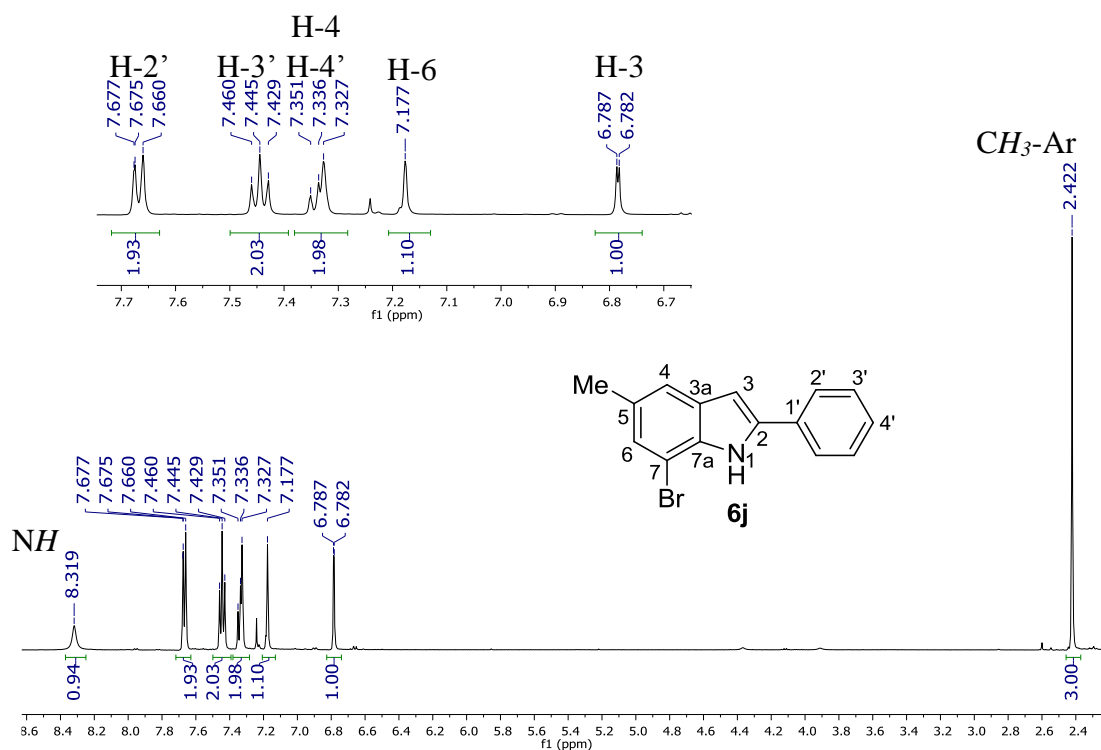

Figure S45. Spectrum of <sup>1</sup>H NMR (500 MHz, CDCl<sub>3</sub>) of **6j**.

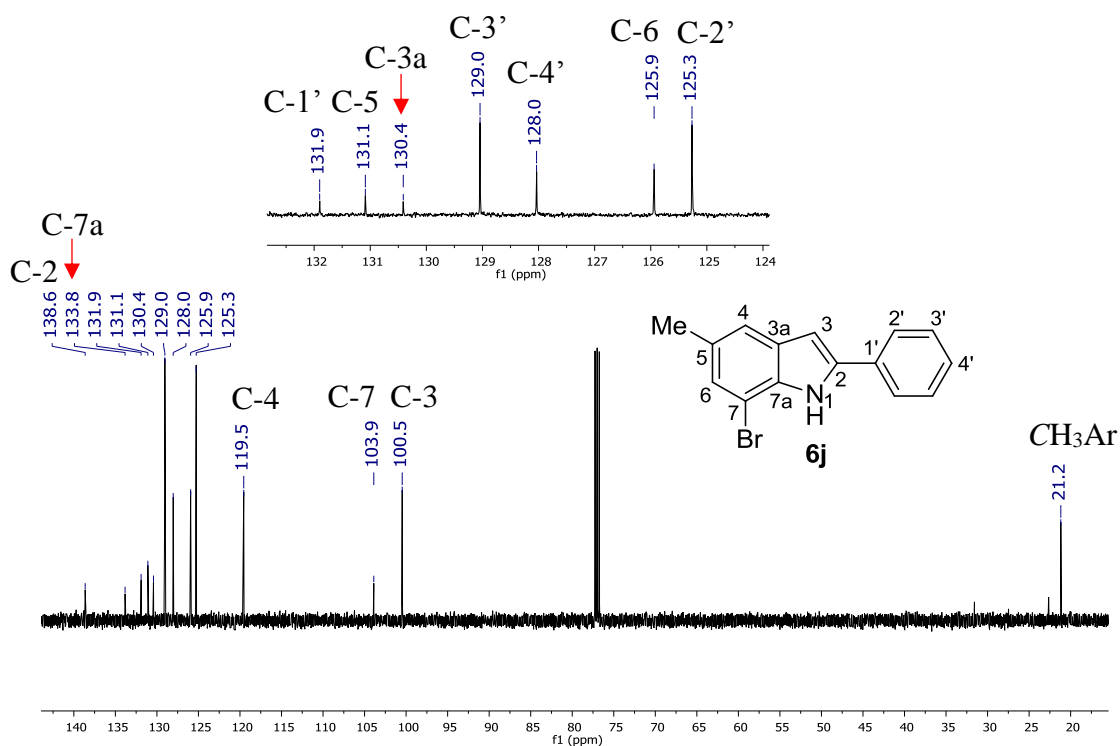

Figure S46. Spectrum of <sup>13</sup>C NMR (125 MHz, CDCl<sub>3</sub>) of **6j**.

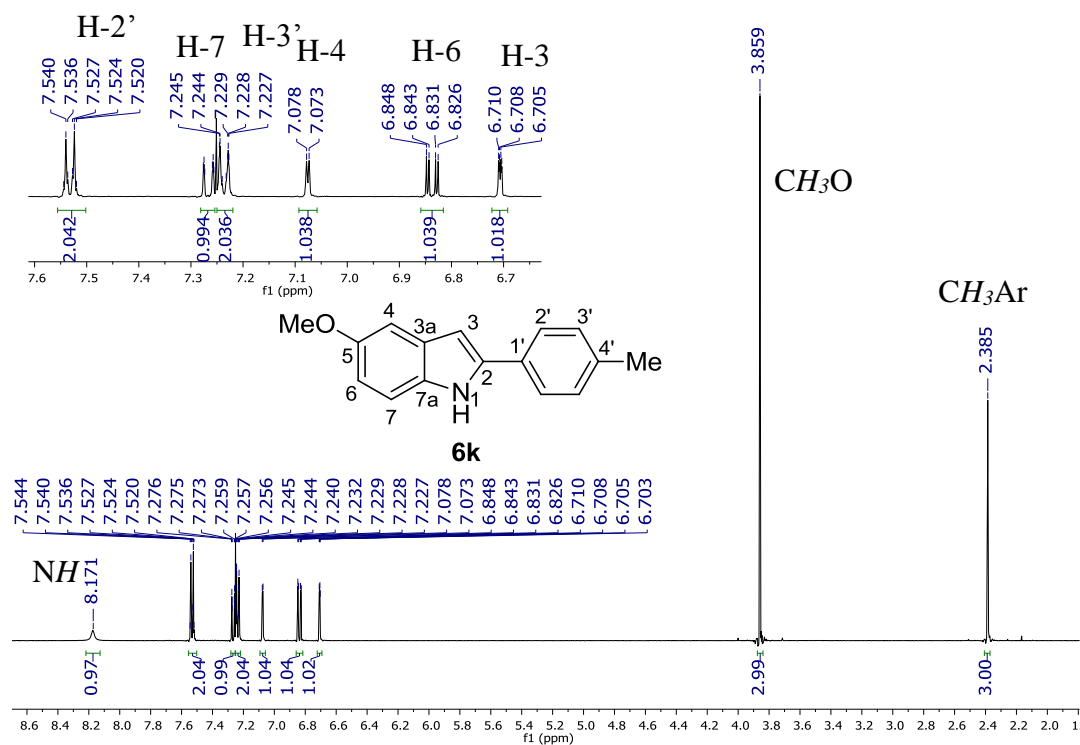

Figure S47. Spectrum of  $^1\text{H}$  NMR (500 MHz,  $\text{CDCl}_3$ ) of **6k**.

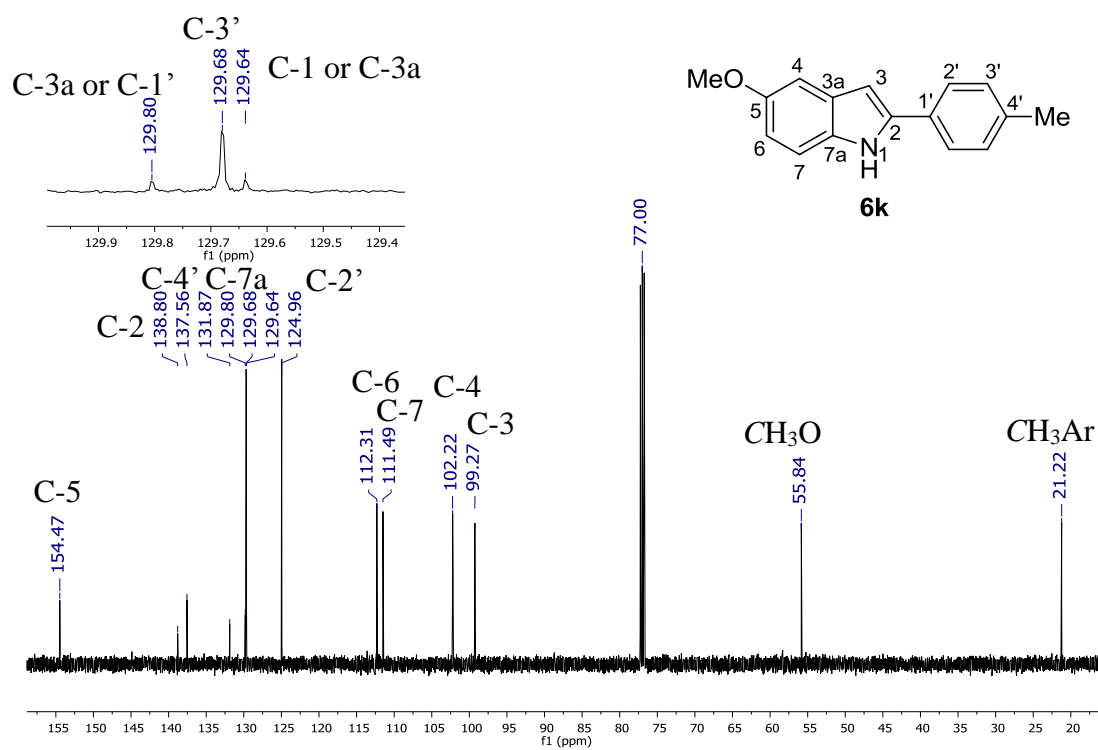

Figure S48. Spectrum of  $^{13}\text{C}$  NMR (125 MHz,  $\text{CDCl}_3$ ) of **6k**.

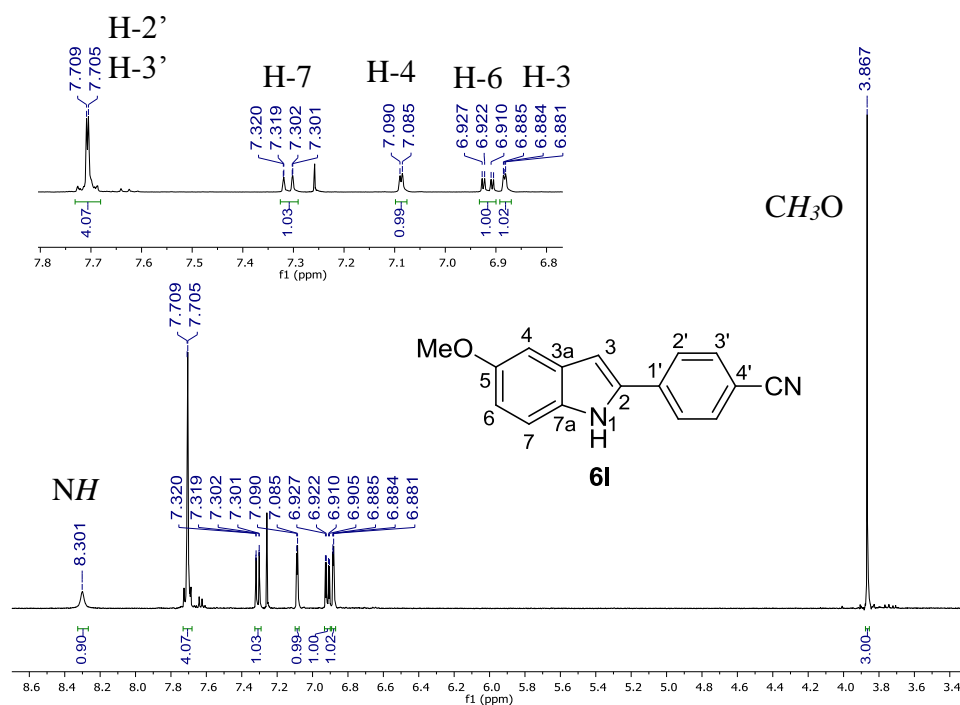

**Figure S49.** Spectrum of  $^1\text{H}$  NMR (500 MHz,  $\text{CDCl}_3$ ) of **6l**.

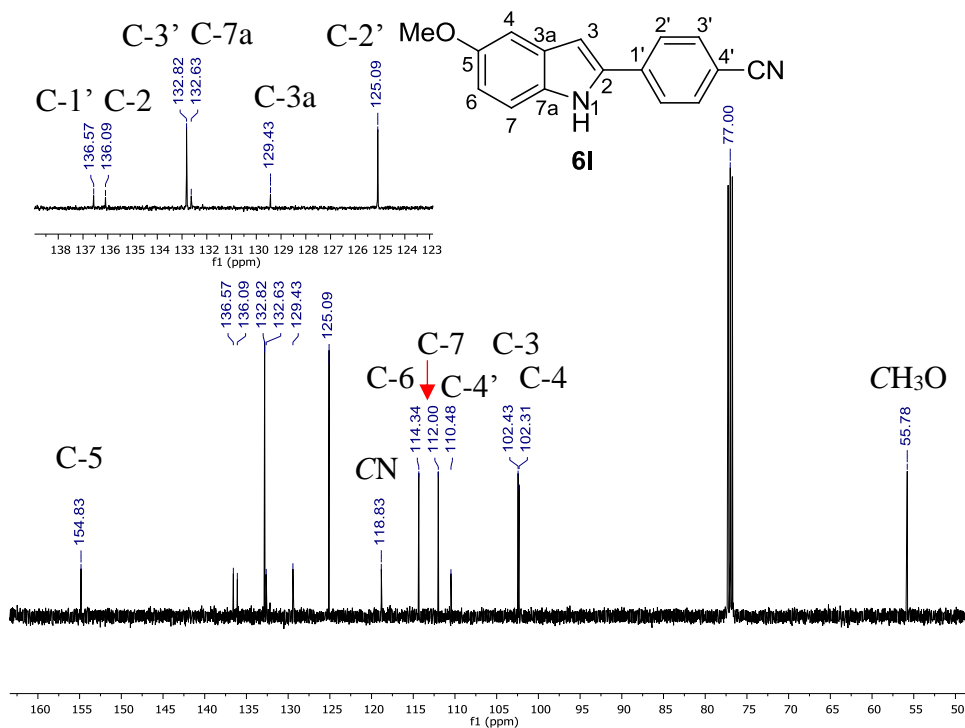

**Figure S50.** Spectrum of  $^{13}\text{C}$  NMR (125 MHz,  $\text{CDCl}_3$ ) of **6l**.

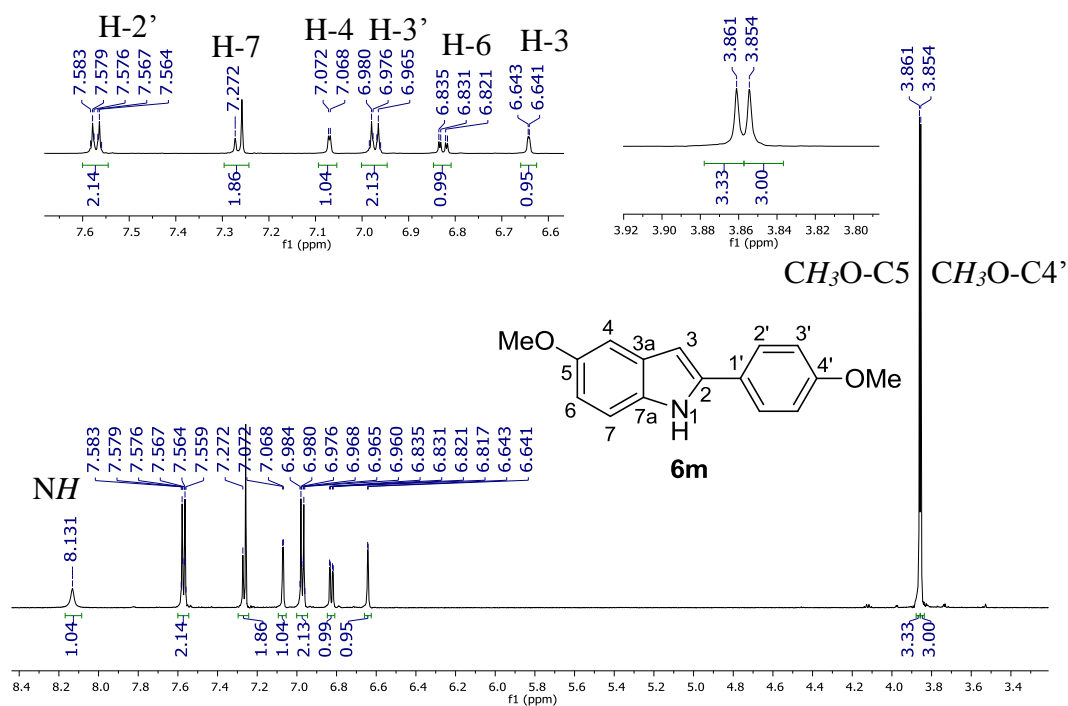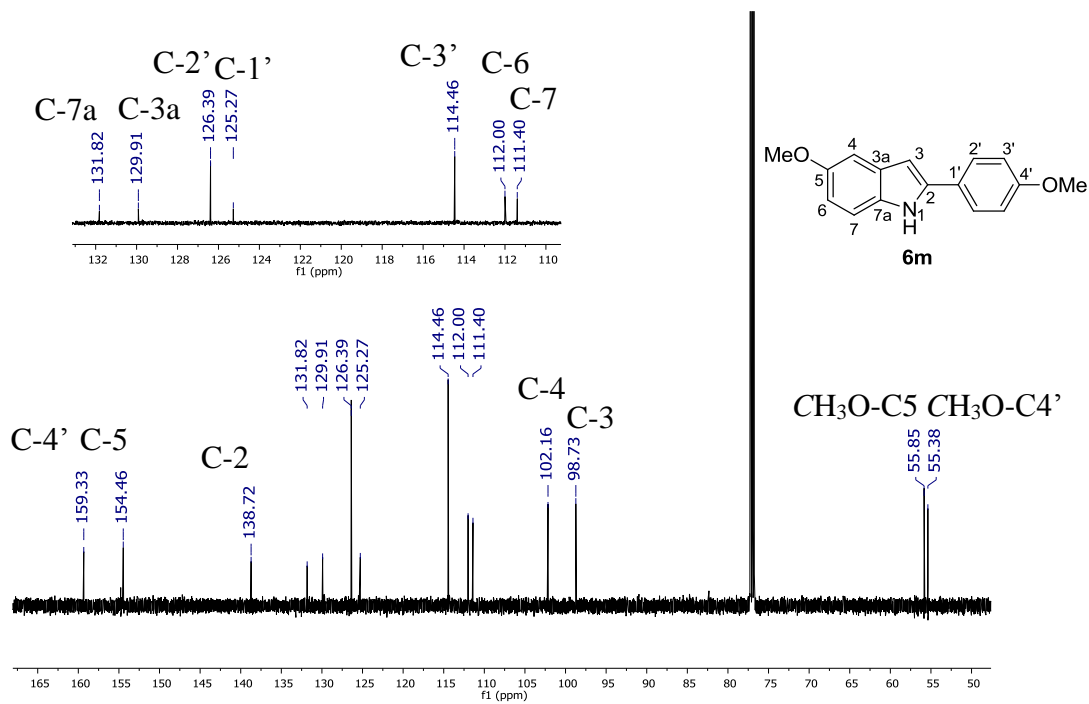

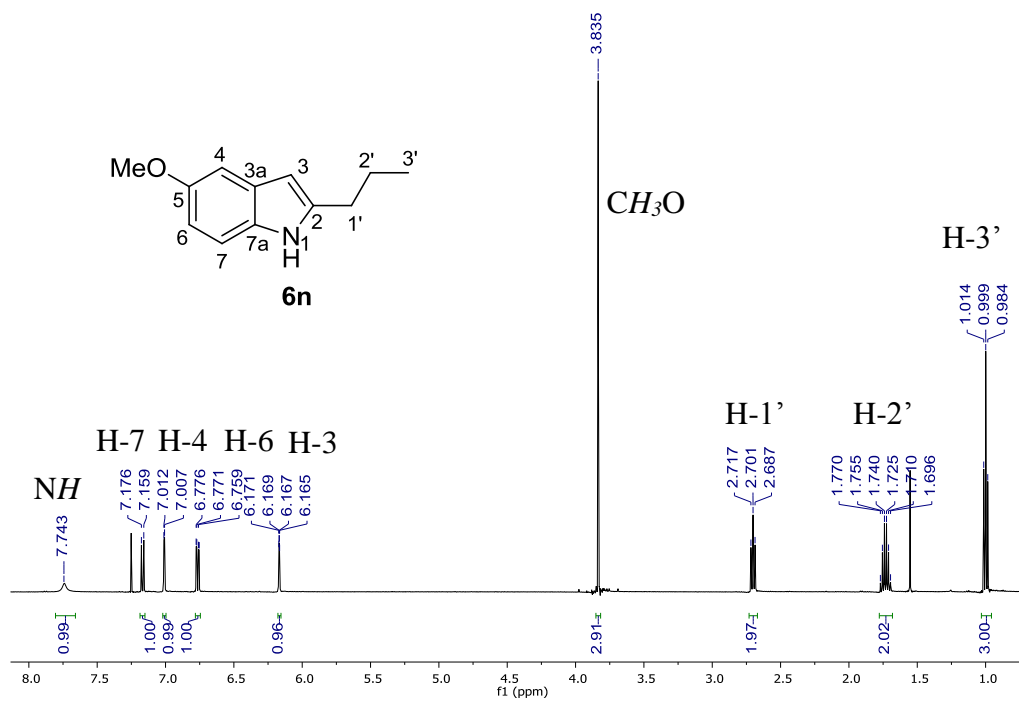

**Figure S53.** Spectrum of <sup>1</sup>H NMR (500 MHz, CDCl<sub>3</sub>) of **6n**.

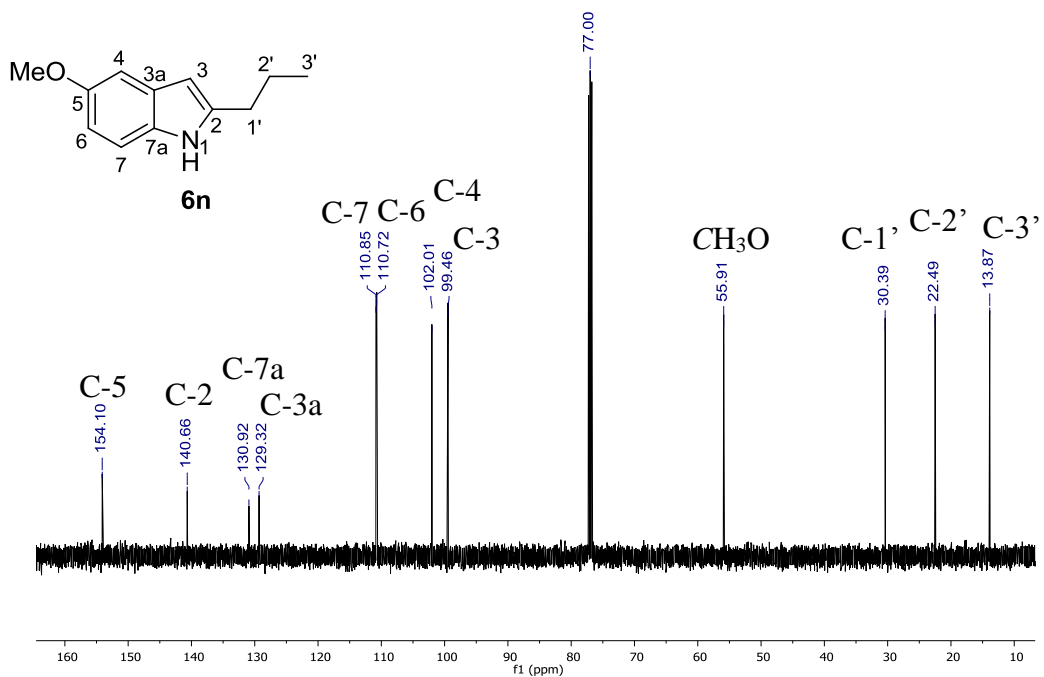

**Figure S54.** Spectrum of <sup>13</sup>C NMR (125 MHz, CDCl<sub>3</sub>) of **6n**.

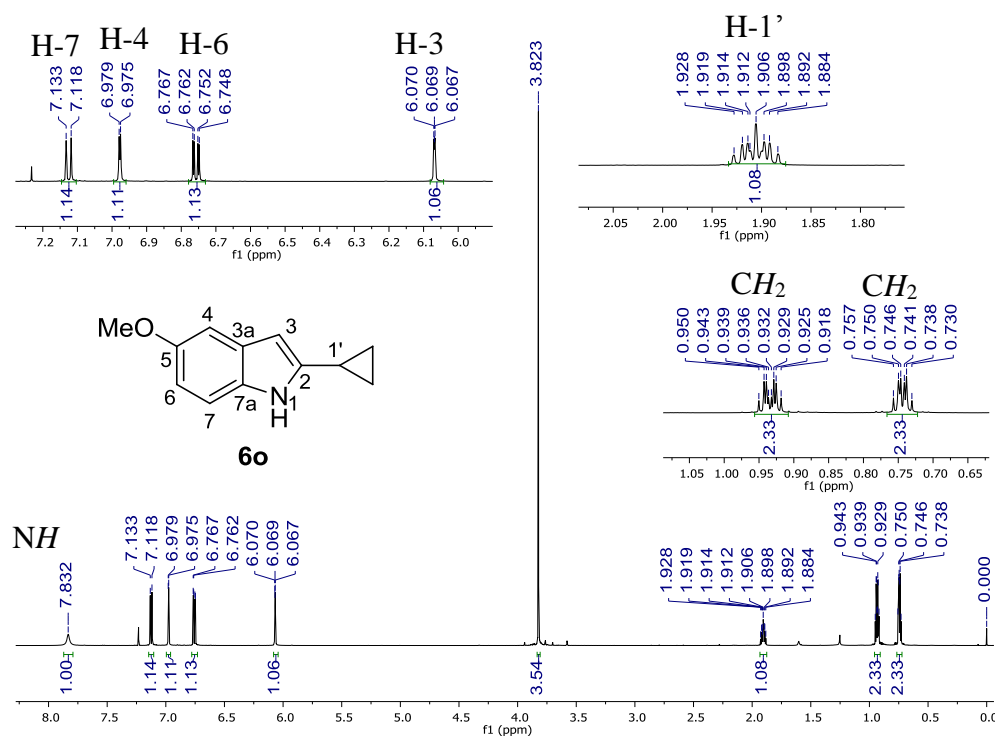

**Figure S55.** Spectrum of <sup>1</sup>H NMR (600 MHz, CDCl<sub>3</sub>) of **6o**.

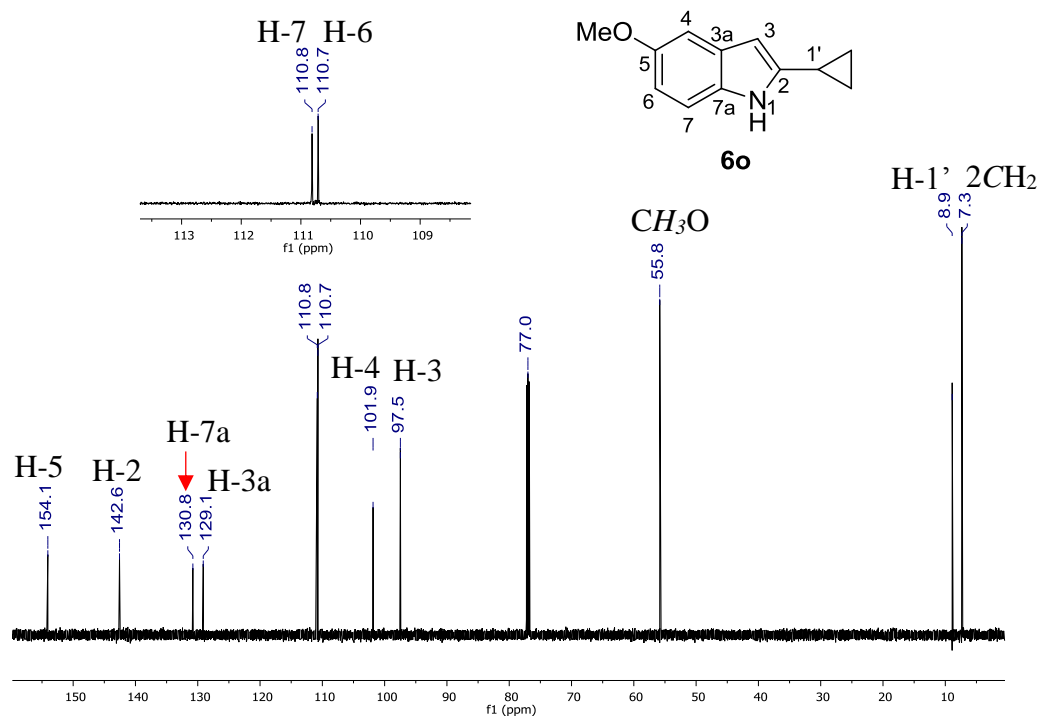

**Figure S56.** Spectrum of <sup>13</sup>C NMR (150 MHz, CDCl<sub>3</sub>) of **6o**.

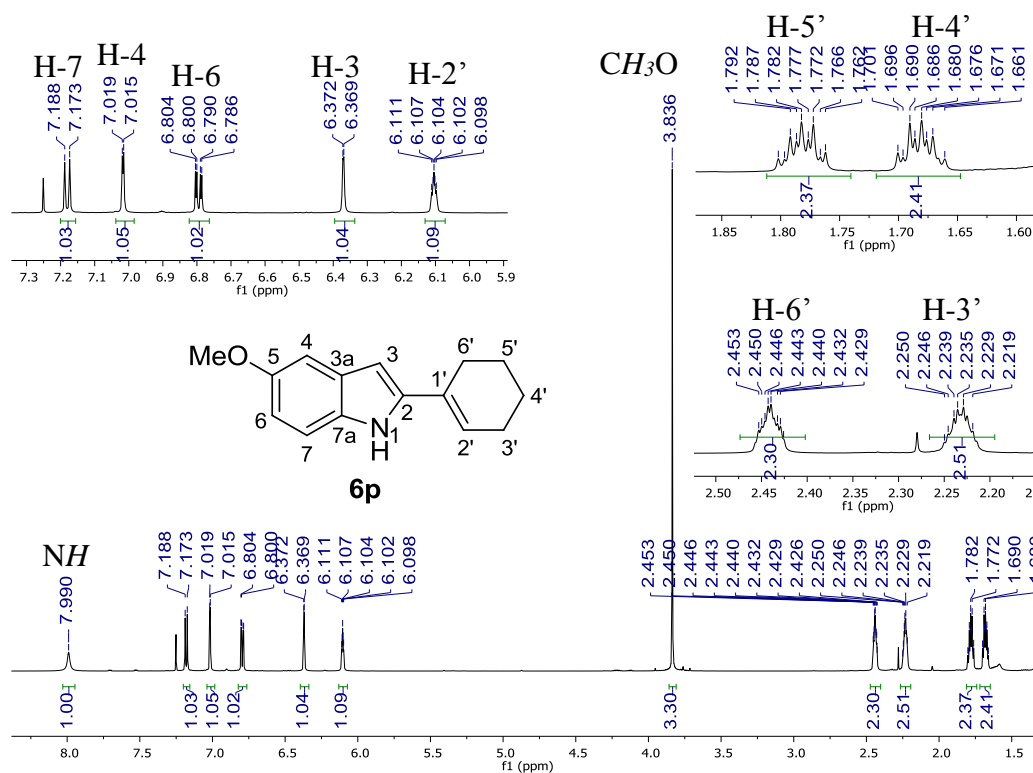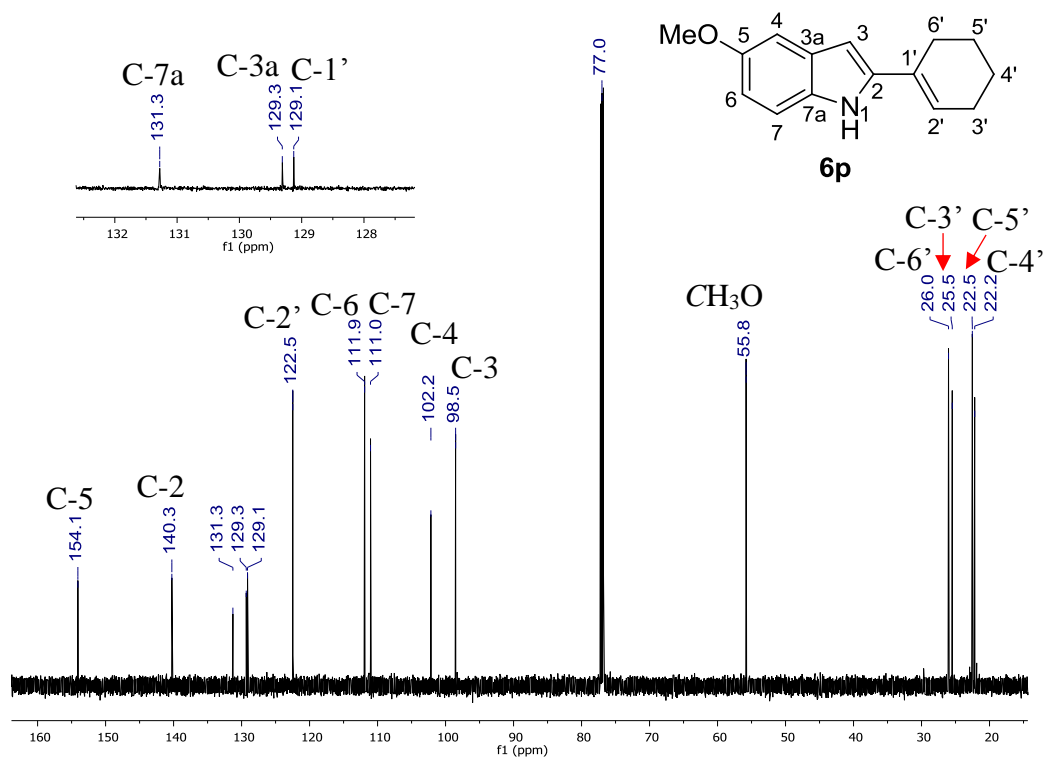

**Table S1.** Crystal data and structure refinement for **5i**.

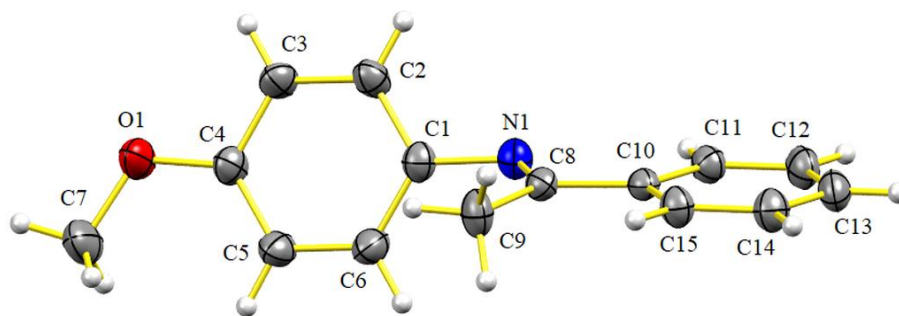

|                                              |                                                   |                  |
|----------------------------------------------|---------------------------------------------------|------------------|
| Identification code (CCDC deposition number) | 2082632                                           |                  |
| Empirical formula                            | C <sub>15</sub> H <sub>15</sub> N O               |                  |
| Formula weight                               | 225.28                                            |                  |
| Temperature                                  | 292(2) K                                          |                  |
| Wavelength                                   | 0.71073 Å                                         |                  |
| Crystal system                               | Monoclinic                                        |                  |
| Space group                                  | P 2 <sub>1</sub> /n                               |                  |
| Unit cell dimensions                         | a = 10.0110(6) Å                                  | α = 90°.         |
|                                              | b = 8.7430(5) Å                                   | β = 104.172(7)°. |
|                                              | c = 14.6687(11) Å                                 | γ = 90°.         |
| Volume                                       | 1244.82(14) Å <sup>3</sup>                        |                  |
| Z                                            | 4                                                 |                  |
| Density (calculated)                         | 1.202 Mg/m <sup>3</sup>                           |                  |
| Absorption coefficient                       | 0.075 mm <sup>-1</sup>                            |                  |
| F(000)                                       | 480                                               |                  |
| Crystal size                                 | 0.790 x 0.470 x 0.270 mm <sup>3</sup>             |                  |
| Theta range for data collection              | 3.655 to 29.183°.                                 |                  |
| Index ranges                                 | -9 ≤ h ≤ 13, -5 ≤ k ≤ 11, -19 ≤ l ≤ 12            |                  |
| Reflections collected                        | 5094                                              |                  |
| Independent reflections                      | 2839 [R(int) = 0.0177]                            |                  |
| Completeness to theta = 27.500°              | 95.5 %                                            |                  |
| Refinement method                            | Full-matrix least-squares on F <sup>2</sup>       |                  |
| Data / restraints / parameters               | 2839 / 0 / 178                                    |                  |
| Goodness-of-fit on F <sup>2</sup>            | 1.042                                             |                  |
| Final R indices [I > 2σ(I)]                  | R <sub>1</sub> = 0.0505, wR <sub>2</sub> = 0.1110 |                  |
| R indices (all data)                         | R <sub>1</sub> = 0.0777, wR <sub>2</sub> = 0.1253 |                  |
| Extinction coefficient                       | n/a                                               |                  |
| Largest diff. peak and hole                  | 0.130 and -0.154 e.Å <sup>-3</sup>                |                  |

**Table S2.** Torsion angles [°] for **5i**.

---

|                         |             |
|-------------------------|-------------|
| C(1)-N(1)-C(8)-C(10)    | 176.72(13)  |
| C(1)-N(1)-C(8)-C(9)     | -3.7(2)     |
| C(11)-C(10)-C(8)-N(1)   | -4.7(2)     |
| C(15)-C(10)-C(8)-N(1)   | 176.97(14)  |
| C(11)-C(10)-C(8)-C(9)   | 175.72(15)  |
| C(15)-C(10)-C(8)-C(9)   | -2.6(2)     |
| C(7)-O(1)-C(4)-C(5)     | 3.0(3)      |
| C(7)-O(1)-C(4)-C(3)     | -176.0(2)   |
| C(11)-C(10)-C(15)-C(14) | -0.6(2)     |
| C(8)-C(10)-C(15)-C(14)  | 177.78(14)  |
| C(8)-N(1)-C(1)-C(6)     | -66.8(2)    |
| C(8)-N(1)-C(1)-C(2)     | 115.31(17)  |
| C(15)-C(10)-C(11)-C(12) | 0.4(2)      |
| C(8)-C(10)-C(11)-C(12)  | -178.07(14) |
| C(6)-C(1)-C(2)-C(3)     | 3.0(2)      |
| N(1)-C(1)-C(2)-C(3)     | -178.95(14) |
| C(1)-C(2)-C(3)-C(4)     | -1.2(2)     |
| O(1)-C(4)-C(3)-C(2)     | 177.55(15)  |
| C(5)-C(4)-C(3)-C(2)     | -1.5(2)     |
| O(1)-C(4)-C(5)-C(6)     | -176.73(15) |
| C(3)-C(4)-C(5)-C(6)     | 2.2(3)      |
| C(12)-C(13)-C(14)-C(15) | 0.0(3)      |
| C(10)-C(15)-C(14)-C(13) | 0.5(3)      |
| C(14)-C(13)-C(12)-C(11) | -0.3(3)     |
| C(10)-C(11)-C(12)-C(13) | 0.1(2)      |
| C(4)-C(5)-C(6)-C(1)     | -0.3(3)     |
| C(2)-C(1)-C(6)-C(5)     | -2.3(3)     |
| N(1)-C(1)-C(6)-C(5)     | 179.71(15)  |

---

Symmetry transformations used to generate equivalent atoms:

**Table S3.** Crystal data and structure refinement for **6e**.

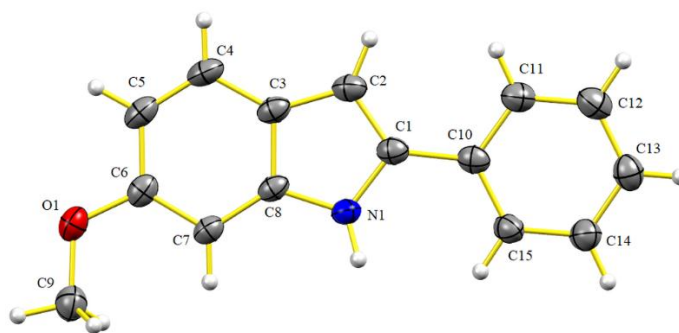

|                                              |                                             |          |
|----------------------------------------------|---------------------------------------------|----------|
| Identification code (CCDC deposition number) | 2082633                                     |          |
| Empirical formula                            | C <sub>15</sub> H <sub>13</sub> N O         |          |
| Formula weight                               | 223.26                                      |          |
| Temperature                                  | 292(2) K                                    |          |
| Wavelength                                   | 0.71073 Å                                   |          |
| Crystal system                               | Orthorhombic                                |          |
| Space group                                  | P 21 21 21                                  |          |
| Unit cell dimensions                         | a = 5.6782(3) Å                             | α = 90°. |
|                                              | b = 8.0462(3) Å                             | β = 90°. |
|                                              | c = 25.5690(16) Å                           | γ = 90°. |
| Volume                                       | 1168.19(11) Å <sup>3</sup>                  |          |
| Z                                            | 4                                           |          |
| Density (calculated)                         | 1.269 Mg/m <sup>3</sup>                     |          |
| Absorption coefficient                       | 0.080 mm <sup>-1</sup>                      |          |
| F(000)                                       | 472                                         |          |
| Crystal size                                 | 0.500 x 0.300 x 0.210 mm <sup>3</sup>       |          |
| Theta range for data collection              | 3.187 to 29.557°.                           |          |
| Index ranges                                 | -7 ≤ h ≤ 6, -10 ≤ k ≤ 9, -19 ≤ l ≤ 34       |          |
| Reflections collected                        | 3635                                        |          |
| Independent reflections                      | 2352 [R(int) = 0.0132]                      |          |
| Completeness to theta = 25.000°              | 99.8 %                                      |          |
| Refinement method                            | Full-matrix least-squares on F <sup>2</sup> |          |
| Data / restraints / parameters               | 2352 / 0 / 174                              |          |
| Goodness-of-fit on F <sup>2</sup>            | 1.056                                       |          |
| Final R indices [I > 2σ(I)]                  | R1 = 0.0387, wR2 = 0.0841                   |          |
| R indices (all data)                         | R1 = 0.0468, wR2 = 0.0899                   |          |
| Absolute structure parameter                 | 0.3(9)                                      |          |
| Extinction coefficient                       | n/a                                         |          |
| Largest diff. peak and hole                  | 0.095 and -0.147 e.Å <sup>-3</sup>          |          |

**Table S4.** Torsion angles [°] for **6e**.

|                         |             |
|-------------------------|-------------|
| C(1)-N(1)-C(8)-C(7)     | -178.35(19) |
| C(1)-N(1)-C(8)-C(3)     | 1.4(2)      |
| C(8)-N(1)-C(1)-C(2)     | -1.4(2)     |
| C(8)-N(1)-C(1)-C(10)    | 179.71(17)  |
| C(9)-O(1)-C(6)-C(7)     | 2.8(3)      |
| C(9)-O(1)-C(6)-C(5)     | -177.33(19) |
| O(1)-C(6)-C(7)-C(8)     | -179.65(17) |
| C(5)-C(6)-C(7)-C(8)     | 0.5(3)      |
| N(1)-C(8)-C(7)-C(6)     | -179.65(18) |
| C(3)-C(8)-C(7)-C(6)     | 0.6(3)      |
| C(2)-C(1)-C(10)-C(11)   | 2.7(3)      |
| N(1)-C(1)-C(10)-C(11)   | -178.78(19) |
| C(2)-C(1)-C(10)-C(15)   | -176.8(2)   |
| N(1)-C(1)-C(10)-C(15)   | 1.8(3)      |
| N(1)-C(8)-C(3)-C(4)     | 178.94(17)  |
| C(7)-C(8)-C(3)-C(4)     | -1.3(3)     |
| N(1)-C(8)-C(3)-C(2)     | -0.9(2)     |
| C(7)-C(8)-C(3)-C(2)     | 178.94(18)  |
| C(7)-C(6)-C(5)-C(4)     | -1.0(3)     |
| O(1)-C(6)-C(5)-C(4)     | 179.18(18)  |
| C(15)-C(10)-C(11)-C(12) | -0.4(3)     |
| C(1)-C(10)-C(11)-C(12)  | -179.9(2)   |
| C(11)-C(10)-C(15)-C(14) | 0.5(3)      |
| C(1)-C(10)-C(15)-C(14)  | 179.9(2)    |
| N(1)-C(1)-C(2)-C(3)     | 0.9(2)      |
| C(10)-C(1)-C(2)-C(3)    | 179.6(2)    |
| C(4)-C(3)-C(2)-C(1)     | -179.8(2)   |
| C(8)-C(3)-C(2)-C(1)     | 0.0(2)      |
| C(10)-C(15)-C(14)-C(13) | -0.2(3)     |
| C(6)-C(5)-C(4)-C(3)     | 0.3(3)      |
| C(8)-C(3)-C(4)-C(5)     | 0.8(3)      |
| C(2)-C(3)-C(4)-C(5)     | -179.5(2)   |
| C(15)-C(14)-C(13)-C(12) | -0.2(3)     |
| C(10)-C(11)-C(12)-C(13) | 0.1(4)      |
| C(14)-C(13)-C(12)-C(11) | 0.2(3)      |

Symmetry transformations used to generate equivalent atoms:

**Table S5.** Crystal data and structure refinement for **6l**.

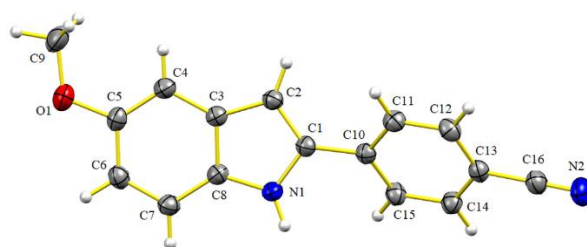

|                                              |                                                   |                 |
|----------------------------------------------|---------------------------------------------------|-----------------|
| Identification code (CCDC deposition number) | 2082634                                           |                 |
| Empirical formula                            | C <sub>16</sub> H <sub>12</sub> N <sub>2</sub> O  |                 |
| Formula weight                               | 248.28                                            |                 |
| Temperature                                  | 292(2) K                                          |                 |
| Wavelength                                   | 0.71073 Å                                         |                 |
| Crystal system                               | Monoclinic                                        |                 |
| Space group                                  | P 2 <sub>1</sub> /c                               |                 |
| Unit cell dimensions                         | a = 7.0104(3) Å                                   | α = 90°.        |
|                                              | b = 14.5242(8) Å                                  | β = 98.202(4)°. |
|                                              | c = 12.5032(7) Å                                  | γ = 90°.        |
| Volume                                       | 1260.06(11) Å <sup>3</sup>                        |                 |
| Z                                            | 4                                                 |                 |
| Density (calculated)                         | 1.309 Mg/m <sup>3</sup>                           |                 |
| Absorption coefficient                       | 0.084 mm <sup>-1</sup>                            |                 |
| F(000)                                       | 520                                               |                 |
| Crystal size                                 | 0.520 x 0.300 x 0.270 mm <sup>3</sup>             |                 |
| Theta range for data collection              | 2.936 to 29.453°.                                 |                 |
| Index ranges                                 | -9 ≤ h ≤ 9, -19 ≤ k ≤ 10, -15 ≤ l ≤ 11            |                 |
| Reflections collected                        | 5405                                              |                 |
| Independent reflections                      | 2909 [R(int) = 0.0154]                            |                 |
| Completeness to theta = 25.000°              | 99.8 %                                            |                 |
| Refinement method                            | Full-matrix least-squares on F <sup>2</sup>       |                 |
| Data / restraints / parameters               | 2909 / 0 / 192                                    |                 |
| Goodness-of-fit on F <sup>2</sup>            | 1.022                                             |                 |
| Final R indices [I > 2σ(I)]                  | R <sub>1</sub> = 0.0450, wR <sub>2</sub> = 0.1001 |                 |
| R indices (all data)                         | R <sub>1</sub> = 0.0633, wR <sub>2</sub> = 0.1135 |                 |
| Extinction coefficient                       | n/a                                               |                 |
| Largest diff. peak and hole                  | 0.138 and -0.163 e.Å <sup>-3</sup>                |                 |

**Table S6.** Torsion angles [°] for **6l**.

---

|                         |             |
|-------------------------|-------------|
| C(1)-N(1)-C(8)-C(7)     | -174.64(13) |
| C(1)-N(1)-C(8)-C(3)     | 2.11(15)    |
| C(4)-C(3)-C(8)-N(1)     | -179.11(11) |
| C(2)-C(3)-C(8)-N(1)     | -1.53(14)   |
| C(4)-C(3)-C(8)-C(7)     | -2.03(18)   |
| C(2)-C(3)-C(8)-C(7)     | 175.55(11)  |
| C(8)-N(1)-C(1)-C(2)     | -1.87(15)   |
| C(8)-N(1)-C(1)-C(10)    | 176.22(11)  |
| C(15)-C(10)-C(1)-C(2)   | -149.99(14) |
| C(11)-C(10)-C(1)-C(2)   | 32.1(2)     |
| C(15)-C(10)-C(1)-N(1)   | 32.41(18)   |
| C(11)-C(10)-C(1)-N(1)   | -145.55(13) |
| N(1)-C(1)-C(2)-C(3)     | 0.88(14)    |
| C(10)-C(1)-C(2)-C(3)    | -176.94(12) |
| C(4)-C(3)-C(2)-C(1)     | 177.45(13)  |
| C(8)-C(3)-C(2)-C(1)     | 0.40(14)    |
| C(8)-C(3)-C(4)-C(5)     | 1.78(18)    |
| C(2)-C(3)-C(4)-C(5)     | -174.98(13) |
| C(11)-C(10)-C(15)-C(14) | 1.20(19)    |
| C(1)-C(10)-C(15)-C(14)  | -176.80(12) |
| C(3)-C(4)-C(5)-O(1)     | -179.76(12) |
| C(3)-C(4)-C(5)-C(6)     | -0.15(19)   |
| C(9)-O(1)-C(5)-C(4)     | 1.8(2)      |
| C(9)-O(1)-C(5)-C(6)     | -177.87(14) |
| N(1)-C(8)-C(7)-C(6)     | 176.93(13)  |
| C(3)-C(8)-C(7)-C(6)     | 0.56(19)    |
| C(10)-C(15)-C(14)-C(13) | 0.8(2)      |
| C(12)-C(13)-C(14)-C(15) | -2.0(2)     |
| C(16)-C(13)-C(14)-C(15) | 176.11(12)  |
| C(8)-C(7)-C(6)-C(5)     | 1.1(2)      |
| C(4)-C(5)-C(6)-C(7)     | -1.4(2)     |
| O(1)-C(5)-C(6)-C(7)     | 178.30(12)  |
| C(15)-C(10)-C(11)-C(12) | -1.95(19)   |
| C(1)-C(10)-C(11)-C(12)  | 176.06(12)  |
| C(10)-C(11)-C(12)-C(13) | 0.7(2)      |
| C(14)-C(13)-C(12)-C(11) | 1.3(2)      |
| C(16)-C(13)-C(12)-C(11) | -176.86(13) |

---

Symmetry transformations used to generate equivalent atoms:
